# Supplementary material
Source: PubMed Central journal article supplement (PMC3393779)
Supplement: NIHMS375020-supplement-Supp_Table_01-07.pdf [file NIHMS375020-supplement-Supp_Table_01-07.pdf]

**Table S1.** Number of surface residues in bound and unbound proteins.

| Amino acid | Interface U <sup>a</sup> /B <sup>b</sup> | Non-interface U/B |
|------------|------------------------------------------|-------------------|
| Ser        | 333/429                                  | 2409/2934         |
| Val        | 175/259                                  | 1003/1116         |
| Thr        | 321/406                                  | 2021/2375         |
| Cys        | 40/58                                    | 183/190           |
| Pro        | 250/295                                  | 1727/2029         |
| Ile        | 136/202                                  | 560/638           |
| Leu        | 245/348                                  | 1095/1258         |
| Asn        | 291/350                                  | 1902/2074         |
| Asp        | 329/433                                  | 2448/2856         |
| His        | 126/174                                  | 682/741           |
| Phe        | 108/176                                  | 457/487           |
| Tyr        | 202/296                                  | 636/718           |
| Trp        | 63/100                                   | 187/220           |
| Gln        | 268/357                                  | 1687/1888         |
| Glu        | 416/545                                  | 2933/3303         |
| Met        | 73/119                                   | 311/329           |
| Lys        | 427/555                                  | 2965/3387         |
| Arg        | 325/474                                  | 1791/2014         |

<sup>a</sup> Unbound

<sup>b</sup> Bound

**Table S2.** Redundant rotamer libraries.**FULL SURFACE LIBRARY****CYS**

| rotamer | $X_1$          |                | rotamer occupancy |     | rotamer share, <sup>c</sup> % |      |
|---------|----------------|----------------|-------------------|-----|-------------------------------|------|
|         | U <sup>a</sup> | B <sup>b</sup> | U                 | B   | U                             | B    |
| 1       | -65.6          | -61.0          | 129               | 129 | 57.8                          | 52.0 |
| 2       | -175.3         | -177.3         | 53                | 55  | 23.8                          | 22.2 |
| 3       | 65.3           | 63.4           | 41                | 57  | 18.4                          | 23.0 |

**SER**

| rotamer | $X_1$ |        | rotamer occupancy |      | rotamer share, % |      |
|---------|-------|--------|-------------------|------|------------------|------|
|         | U     | B      | U                 | B    | U                | B    |
| 1       | 61.8  | 62.9   | 1366              | 1683 | 49.8             | 50.0 |
| 2       | -63.6 | -62.0  | 825               | 1000 | 30.1             | 29.7 |
| 3       | 177.6 | -179.5 | 551               | 680  | 20.1             | 20.2 |

**THR**

| rotamer | $X_1$  |        | rotamer occupancy |      | rotamer share, % |      |
|---------|--------|--------|-------------------|------|------------------|------|
|         | U      | B      | U                 | B    | U                | B    |
| 1       | 61.0   | 61.3   | 1197              | 1376 | 51.1             | 49.5 |
| 2       | -59.7  | -59.4  | 953               | 1199 | 40.7             | 43.1 |
| 3       | -174.7 | -178.3 | 192               | 206  | 8.2              | 7.4  |

**VAL**

| rotamer | $X_1$ |       | rotamer occupancy |     | rotamer share, % |      |
|---------|-------|-------|-------------------|-----|------------------|------|
|         | U     | B     | U                 | B   | U                | B    |
| 1       | 177.7 | 177.4 | 802               | 949 | 68.1             | 69.0 |
| 2       | -62.9 | -62.1 | 254               | 293 | 21.6             | 21.3 |
| 3       | 61.7  | 67.9  | 117               | 129 | 9.9              | 9.4  |

<sup>a</sup> Unbound.<sup>b</sup> Bound.

<sup>c</sup> Share of rotamer  $i$  is  $\frac{N_i}{\sum_i N_i + N_{non}}$  100%, where  $N_i$  is rotamer occupancy,  $N_{non}$  is the number of non-rotamer conformations, the sum runs over all rotamers.

## ASP

| rotamer | X <sub>1</sub> | X <sub>2</sub> | X <sub>1</sub> | X <sub>2</sub> | rotamer occupancy |      | rotamer share, % |      |
|---------|----------------|----------------|----------------|----------------|-------------------|------|------------------|------|
|         | U              |                | B              |                | U                 | B    | U                | B    |
| 1       | -72.0          | -14.7          | -70.4          | -16.2          | 1152              | 1325 | 41.6             | 40.3 |
| 2       | -174.4         | 8.2            | -173.8         | 1.8            | 512               | 585  | 18.5             | 17.8 |
| 3       | 63.6           | 1.6            | 61.3           | 2.2            | 365               | 362  | 13.2             | 11.0 |
| 4       | -173.1         | -19.6          | -171.1         | -20.9          | 293               | 347  | 10.6             | 10.6 |
| 5       | -66.2          | -76.3          | -56.9          | -68.3          | 263               | 383  | 9.5              | 11.6 |
| 6       | 64.7           | -52.2          | 60.0           | -55.1          | 187               | 284  | 6.7              | 8.6  |

## PHE

| rotamer | X <sub>1</sub> | X <sub>2</sub> | X <sub>1</sub> | X <sub>2</sub> | rotamer occupancy |     | rotamer share, % |      |
|---------|----------------|----------------|----------------|----------------|-------------------|-----|------------------|------|
|         | U              |                | B              |                | U                 | B   | U                | B    |
| 1       | -62.1          | 99.1           | -62.3          | 102.8          | 250               | 312 | 44.2             | 47.1 |
| 2       | 179.8          | 75.8           | -180.0         | 75.3           | 210               | 224 | 37.2             | 33.8 |
| 3       | 61.4           | 87.5           | 65.4           | 90.7           | 58                | 80  | 10.3             | 12.1 |
| 4       | -63.9          | -19.2          | -68.0          | -23.1          | 44                | 43  | 7.8              | 6.5  |

## HIS

| rotamer | X <sub>1</sub> | X <sub>2</sub> | X <sub>1</sub> | X <sub>2</sub> | rotamer occupancy |     | rotamer share, % |      |
|---------|----------------|----------------|----------------|----------------|-------------------|-----|------------------|------|
|         | U              |                | B              |                | U                 | B   | U                | B    |
| 1       | -62.6          | -67.6          | -60.6          | -70.9          | 207               | 258 | 25.6             | 28.2 |
| 2       | -66.5          | 88.5           | -65.9          | 87.3           | 161               | 159 | 19.9             | 17.4 |
| 3       | 179.8          | 66.9           | -178.2         | 83.1           | 106               | 128 | 13.1             | 14.0 |
| 4       | -175.1         | -82.1          | -176.0         | -75.3          | 93                | 80  | 11.5             | 8.7  |
| 5       | 76.1           | -89.5          | 72.0           | -93.2          | 82                | 84  | 10.1             | 9.2  |
| 6       | -68.6          | 170.0          | -67.2          | 168.7          | 64                | 72  | 7.9              | 7.9  |
| 7       | 67.5           | 95.7           | 72.4           | 91.8           | 32                | 41  | 4.0              | 4.5  |
| 8       | -167.6         | -160.3         | -179.3         | -157.7         | 29                | 40  | 3.6              | 4.4  |
| 9       | -70.5          | -1.0           | -76.1          | 46.2           | 25                | 41  | 3.1              | 4.5  |

## ILE

| rotamer | X <sub>1</sub> | X <sub>2</sub> | X <sub>1</sub> | X <sub>2</sub> | rotamer occupancy |     | rotamer share, % |      |
|---------|----------------|----------------|----------------|----------------|-------------------|-----|------------------|------|
|         | U              |                | B              |                | U                 | B   | U                | B    |
| 1       | -63.1          | 172.2          | -63.9          | 175.7          | 341               | 415 | 49.0             | 49.4 |
| 2       | -61.0          | -60.1          | -58.4          | -59.1          | 125               | 146 | 18.0             | 17.4 |
| 3       | 65.2           | 174.6          | 62.5           | 173.8          | 93                | 109 | 13.4             | 13.0 |
| 4       | -168.6         | 172.6          | -180.0         | 171.0          | 46                | 45  | 6.6              | 5.4  |
| 5       | -65.1          | 73.9           | -59.9          | 79.7           | 36                | 50  | 5.2              | 6.0  |
| 6       | 50.9           | 66.5           | 78.8           | 94.5           | 20                | 20  | 2.9              | 2.4  |
| 7       | -170.7         | 61.0           | -171.7         | 70.4           | 19                | 39  | 2.7              | 4.6  |

## LEU

| rotamer | X <sub>1</sub> | X <sub>2</sub> | X <sub>1</sub> | X <sub>2</sub> | rotamer occupancy |     | rotamer share, % |      |
|---------|----------------|----------------|----------------|----------------|-------------------|-----|------------------|------|
|         | U              |                | B              |                | U                 | B   | U                | B    |
| 1       | -63.4          | 175.1          | -65.1          | 175.2          | 780               | 914 | 58.2             | 56.9 |
| 2       | -178.3         | 60.3           | -176.6         | 63.6           | 295               | 331 | 22.0             | 20.6 |
| 3       | -94.9          | 31.9           | -82.6          | 58.0           | 90                | 137 | 6.7              | 8.5  |
| 4       | -144.1         | 148.8          | -145.0         | -146.8         | 47                | 68  | 3.5              | 4.2  |
| 5       | -70.0          | -57.2          | -63.5          | -48.9          | 37                | 58  | 2.8              | 3.6  |
| 6       | -167.7         | -82.2          | -168.3         | -86.2          | 22                | 29  | 1.6              | 1.8  |
| 7       | -50.3          | 104.7          | -59.6          | 74.4           | 14                | 27  | 1.0              | 1.7  |
| 8       | 53.9           | 74.5           | 20.5           | 78.7           | 20                | 12  | 1.5              | 0.7  |
| 9       | -173.8         | 166.6          |                |                | 18                |     | 1.3              |      |
| 10      | 68.0           | 140.6          | 58.8           | 174.7          | 12                | 24  | 0.9              | 1.5  |

## ASN

| rotamer | X <sub>1</sub> | X <sub>2</sub> | X <sub>1</sub> | X <sub>2</sub> | rotamer occupancy |     | rotamer share, % |      |
|---------|----------------|----------------|----------------|----------------|-------------------|-----|------------------|------|
|         | U              |                | B              |                | U                 | B   | U                | B    |
| 1       | -64.7          | -47.4          | -61.3          | -47.2          | 863               | 958 | 39.4             | 39.5 |
| 2       | -173.3         | 58.0           | -168.8         | 49.6           | 357               | 420 | 16.3             | 17.3 |
| 3       | -68.4          | 166.3          | -67.0          | 166.0          | 386               | 478 | 17.6             | 19.7 |
| 4       | 59.6           | 13.8           | 55.2           | 50.1           | 236               | 262 | 10.8             | 10.8 |
| 5       | -173.3         | -49.1          | -172.8         | -83.3          | 265               | 225 | 12.1             | 9.3  |

## PRO

| rotamer | X <sub>1</sub> | X <sub>2</sub> | X <sub>1</sub> | X <sub>2</sub> | rotamer occupancy |      | rotamer share, % |      |
|---------|----------------|----------------|----------------|----------------|-------------------|------|------------------|------|
|         | U              |                | B              |                | U                 | B    | U                | B    |
| 1       | -29.0          | 38.6           | -29.1          | 40.4           | 1076              | 1269 | 54.4             | 54.6 |
| 2       | 30.8           | -38.7          | 30.5           | -39.8          | 901               | 1055 | 45.6             | 45.4 |

## TRP

| rotamer | X <sub>1</sub> | X <sub>2</sub> | X <sub>1</sub> | X <sub>2</sub> | rotamer occupancy |     | rotamer share, % |      |
|---------|----------------|----------------|----------------|----------------|-------------------|-----|------------------|------|
|         | U              |                | B              |                | U                 | B   | U                | B    |
| 1       | -61.9          | 87.5           | -68.1          | 86.2           | 98                | 132 | 39.2             | 41.3 |
| 2       | -177.9         | -110.7         | -179.2         | -108.5         | 28                | 40  | 11.2             | 12.5 |
| 3       | -65.8          | -8.6           | -76.2          | 0.0            | 26                | 26  | 10.4             | 8.1  |
| 4       | 177.6          | 74.3           | -177.5         | 82.8           | 26                | 45  | 10.4             | 14.1 |
| 5       | 61.5           | -92.2          | 61.4           | -96.4          | 21                | 28  | 8.4              | 8.8  |
| 6       | -54.4          | -59.9          | -61.8          | -95.6          | 23                | 20  | 9.2              | 6.3  |
| 7       | 60.9           | 92.9           | 64.4           | 82.4           | 16                | 20  | 6.4              | 6.3  |

## TYR

| rotamer | X <sub>1</sub> | X <sub>2</sub> | X <sub>1</sub> | X <sub>2</sub> | rotamer occupancy |     | rotamer share, % |      |
|---------|----------------|----------------|----------------|----------------|-------------------|-----|------------------|------|
|         | U              |                | B              |                | U                 | B   | U                | B    |
| 1       | -62.6          | 93.9           | -66.3          | 96.0           | 410               | 469 | 48.9             | 46.3 |
| 2       | 178.1          | 74.8           | -179.7         | 74.8           | 270               | 360 | 32.2             | 35.5 |
| 3       | 61.1           | 93.5           | 60.4           | 89.8           | 102               | 115 | 12.2             | 11.3 |
| 4       | -68.4          | -1.2           | -65.2          | -29.1          | 52                | 62  | 6.2              | 6.1  |

## GLU

| rotamer | X <sub>1</sub> | X <sub>2</sub> | X <sub>3</sub> | X <sub>1</sub> | X <sub>2</sub> | X <sub>3</sub> | rotamer occupancy |     | rotamer share, % |      |
|---------|----------------|----------------|----------------|----------------|----------------|----------------|-------------------|-----|------------------|------|
|         | U              |                |                | B              |                |                | U                 | B   | U                | B    |
| 1       | -67.6          | 176.4          | -10.0          | -59.6          | -177.0         | -54.5          | 709               | 746 | 21.2             | 19.4 |
| 2       | -66.9          | -179.0         | 57.4           | -73.7          | 179.2          | 53.0           | 417               | 539 | 12.5             | 14.0 |
| 3       | -176.6         | 179.2          | -6.6           | -177.3         | 179.3          | -7.5           | 447               | 529 | 13.3             | 13.7 |
| 4       | -68.7          | -58.0          | -59.1          | -68.4          | -66.7          | -60.0          | 383               | 463 | 11.4             | 12.0 |
| 5       | 173.4          | 174.0          | 50.5           | -174.7         | -176.4         | -55.3          | 282               | 358 | 8.4              | 9.3  |
| 6       | -178.1         | 62.2           | 24.6           | -177.9         | 58.8           | 48.5           | 231               | 245 | 6.9              | 6.4  |
| 7       | 59.8           | 177.5          | 30.8           | 60.9           | 179.9          | -4.0           | 150               | 85  | 4.5              | 2.2  |
| 8       | -67.5          | 80.2           | 10.4           | -72.5          | 62.8           | 54.2           | 139               | 141 | 4.2              | 3.7  |
| 9       | 68.8           | 176.1          | -50.6          | 68.5           | 173.7          | -56.0          | 110               | 166 | 3.3              | 4.3  |
| 10      | -64.6          | -82.2          | 38.2           | -69.6          | -51.1          | 74.2           | 82                | 119 | 2.4              | 3.1  |
| 11      | 65.7           | -90.1          | 35.5           | 59.3           | -75.8          | -2.6           | 62                | 63  | 1.9              | 1.6  |
| 12      | -63.6          | 97.0           | -39.7          | -72.0          | 85.5           | -6.9           | 75                | 106 | 2.2              | 2.8  |
| 13      | -170.9         | 63.3           | -65.8          | -175.9         | 70.4           | 5.4            | 44                | 104 | 1.3              | 2.7  |
| 14      | -177.1         | -77.9          | -33.5          | -173.5         | -91.0          | -20.5          | 51                | 37  | 1.5              | 1.0  |
| 15      | 61.9           | -103.7         | 73.2           | 63.5           | -93.8          | 25.3           | 47                | 38  | 1.4              | 1.0  |

## GLN

| rotamer | X <sub>1</sub> | X <sub>2</sub> | X <sub>3</sub> | X <sub>1</sub> | X <sub>2</sub> | X <sub>3</sub> | rotamer occupancy |     | rotamer share, % |      |
|---------|----------------|----------------|----------------|----------------|----------------|----------------|-------------------|-----|------------------|------|
|         | U              |                |                | B              |                |                | U                 | B   | U                | B    |
| 1       | -62.4          | -170.7         | -50.7          | -61.2          | -179.3         | -55.0          | 323               | 386 | 16.5             | 17.2 |
| 2       | -63.7          | 176.7          | 58.7           | -70.3          | -177.8         | 50.4           | 297               | 261 | 15.2             | 11.6 |
| 3       | -60.6          | -60.0          | -57.7          | -62.9          | -58.0          | -57.4          | 229               | 220 | 11.7             | 9.8  |
| 4       | 175.6          | -174.6         | 60.5           | 177.6          | 177.6          | 53.0           | 137               | 145 | 7.0              | 6.5  |
| 5       | -65.4          | 174.2          | -180.0         | -67.1          | -179.0         | 171.8          | 144               | 149 | 7.4              | 6.6  |
| 6       | -167.7         | 59.8           | 49.5           | -174.1         | 54.8           | 60.3           | 114               | 151 | 5.8              | 6.7  |
| 7       | -174.1         | -178.2         | -49.7          | -174.4         | -175.5         | -55.5          | 112               | 173 | 5.7              | 7.7  |
| 8       | -65.3          | -56.8          | 120.2          | -60.5          | -58.6          | 134.4          | 105               | 135 | 5.4              | 6.0  |
| 9       | -176.3         | 179.1          | 134.4          | 175.6          | 178.0          | 172.9          | 76                | 73  | 3.9              | 3.3  |
| 10      | 69.5           | -177.7         | -57.4          | 56.0           | 178.7          | -65.5          | 49                | 52  | 2.5              | 2.3  |
| 11      | 179.2          | 71.0           | -171.6         | -157.0         | 66.5           | -114.0         | 47                | 76  | 2.4              | 3.4  |
| 12      | -71.6          | 79.6           | 7.0            | -81.6          | 67.8           | 48.6           | 45                | 50  | 2.3              | 2.2  |
| 13      | -175.2         | 43.2           | -88.0          | -64.2          | 101.8          | -58.1          | 31                | 43  | 1.6              | 1.9  |

|    |        |        |       |        |        |        |    |    |     |     |
|----|--------|--------|-------|--------|--------|--------|----|----|-----|-----|
| 14 | 73.0   | -176.7 | 73.2  | 51.8   | -177.2 | 54.2   | 26 | 55 | 1.3 | 2.4 |
| 15 | 55.8   | -95.5  | 30.8  | 71.3   | -91.5  | 35.9   | 19 | 27 | 1.0 | 1.2 |
| 16 | 41.5   | -172.4 | 179.1 | 78.2   | -172.9 | -158.3 | 18 | 25 | 0.9 | 1.1 |
| 17 | -172.6 | -87.1  | -31.1 | -128.9 | -84.4  | -70.0  | 13 | 22 | 0.7 | 1.1 |

### MET

| rotamer | X <sub>1</sub> | X <sub>2</sub> | X <sub>3</sub> | X <sub>1</sub> | X <sub>2</sub> | X <sub>3</sub> | rotamer occupancy |    | rotamer share, % |      |
|---------|----------------|----------------|----------------|----------------|----------------|----------------|-------------------|----|------------------|------|
|         | U              |                |                | B              |                |                | U                 | B  | U                | B    |
| 1       | -61.0          | -60.7          | -71.0          | -57.8          | -54.4          | -70.0          | 71                | 84 | 18.5             | 18.8 |
| 2       | -65.6          | 178.2          | -54.5          | -59.7          | -173.9         | -74.1          | 50                | 47 | 13.0             | 10.5 |
| 3       | -63.5          | 173.3          | 68.7           | -67.9          | 175.4          | 66.6           | 42                | 69 | 10.9             | 15.4 |
| 4       | 171.9          | 161.0          | 65.1           | -174.6         | -176.9         | 76.2           | 25                | 23 | 6.5              | 5.1  |
| 5       | -58.1          | -61.9          | 106.4          | -78.7          | -59.4          | 104.5          | 25                | 31 | 6.5              | 6.9  |
| 6       | -177.2         | -174.8         | -70.0          | -175.1         | 172.3          | -67.7          | 20                | 42 | 5.2              | 9.4  |
| 7       | -65.5          | 176.1          | -170.9         | -69.6          | 170.4          | 164.1          | 19                | 17 | 4.9              | 3.8  |
| 8       | -168.4         | 69.2           | 80.4           | -177.5         | 55.7           | 75.6           | 16                | 29 | 4.2              | 6.5  |
| 9       | 170.6          | 75.0           | -85.7          |                |                |                | 12                |    | 3.1              |      |
| 9       |                |                |                | 64.3           | 168.6          | 73.7           |                   | 9  |                  | 2.0  |
| 10      | 76.0           | -178.9         | -68.1          | 59.2           | -175.9         | -70.8          | 9                 | 16 | 2.3              | 3.6  |

### ARG

| rotamer | X <sub>1</sub> | X <sub>2</sub> | X <sub>3</sub> | X <sub>4</sub> | X <sub>1</sub> | X <sub>2</sub> | X <sub>3</sub> | X <sub>4</sub> | rotamer occupancy |     | rotamer share, % |     |
|---------|----------------|----------------|----------------|----------------|----------------|----------------|----------------|----------------|-------------------|-----|------------------|-----|
|         | U              |                |                |                | B              |                |                |                | U                 | B   | U                | B   |
| 1       | -59.2          | 177.1          | 179.8          | 179.9          | -59.9          | -175.4         | -179.8         | -177.2         | 204               | 221 | 9.6              | 8.9 |
| 2       | -72.8          | 169.3          | 179.1          | -77.1          | -73.6          | 174.5          | 178.3          | -64.1          | 111               | 124 | 5.2              | 5.0 |
| 3       | -172.9         | 177.3          | -179.7         | 180.0          | -179.6         | 177.7          | 180.0          | -178.3         | 101               | 127 | 4.8              | 5.1 |
| 4       | -169.5         | 179.0          | -60.5          | 144.4          | -178.1         | -168.2         | -55.5          | 165.3          | 110               | 109 | 5.2              | 4.4 |
| 5       | -64.6          | -172.5         | -176.3         | 62.7           | -60.1          | -157.2         | -171.3         | 86.0           | 104               | 101 | 4.9              | 4.1 |
| 6       | -62.4          | 165.0          | 80.2           | 167.9          | -69.0          | -177.9         | 58.8           | -173.2         | 110               | 120 | 5.2              | 4.8 |
| 7       | -68.6          | -165.7         | -67.0          | -82.5          | -70.0          | -163.1         | -61.0          | -85.9          | 94                | 103 | 4.4              | 4.1 |
| 8       | -67.8          | 179.0          | -65.6          | 102.0          | -68.9          | -175.0         | -70.1          | -178.8         | 124               | 127 | 5.9              | 5.1 |
| 9       | -62.4          | -63.4          | 178.2          | -176.1         | -67.1          | -62.0          | 178.7          | 173.3          | 74                | 60  | 3.5              | 2.4 |
| 10      | -171.7         | 171.8          | 106.6          | -129.7         | -172.4         | 174.8          | 61.5           | -171.2         | 83                | 102 | 3.9              | 4.1 |
| 11      | -177.0         | -179.3         | -68.4          | -92.6          | 179.6          | 166.5          | -61.2          | -84.1          | 62                | 63  | 2.9              | 2.5 |
| 12      | 175.8          | 179.0          | 60.9           | 70.1           | 174.8          | 172.1          | 66.6           | 86.4           | 48                | 73  | 2.3              | 2.9 |
| 13      | 177.4          | 178.2          | 173.6          | 75.8           | 176.3          | -173.7         | 179.4          | 65.4           | 40                | 47  | 1.9              | 1.9 |
| 14      | 169.4          | 175.7          | 176.3          | -80.2          | -168.1         | 173.3          | 177.2          | -68.6          | 39                | 56  | 1.8              | 2.3 |
| 15      | 60.2           | -178.3         | 174.5          | 71.5           | 58.7           | -176.4         | 176.4          | 97.8           | 39                | 42  | 1.8              | 1.7 |
| 16      | -61.0          | -172.5         | 72.0           | 80.2           | -65.5          | -179.0         | 59.2           | 76.4           | 37                | 49  | 1.7              | 2.0 |
| 17      | 68.7           | -177.1         | -169.9         | -176.7         | 69.4           | 178.9          | -174.1         | -71.6          | 31                | 37  | 1.5              | 1.5 |
| 18      | 87.1           | -168.4         | -54.6          | 173.6          | 49.4           | -177.4         | -71.4          | -171.5         | 31                | 43  | 1.5              | 1.7 |
| 19      | -179.7         | 51.5           | -179.6         | 168.3          | 176.5          | 69.0           | -169.7         | -177.7         | 30                | 28  | 1.4              | 1.1 |
| 20      | 61.7           | 174.0          | 64.7           | -152.9         | 67.3           | -173.3         | 58.9           | -158.4         | 27                | 33  | 1.3              | 1.3 |

|    |       |        |        |       |        |       |        |       |    |    |     |     |
|----|-------|--------|--------|-------|--------|-------|--------|-------|----|----|-----|-----|
| 21 | -46.2 | -43.9  | -66.2  | 160.2 | -67.7  | -74.6 | -66.5  | 176.3 | 27 | 49 | 1.3 | 2.0 |
| 22 | -79.4 | -64.8  | -178.4 | -82.1 | -64.3  | -61.0 | -176.1 | -89.2 | 27 | 42 | 1.3 | 1.7 |
| 23 | 70.7  | -172.8 | 177.4  | -77.5 |        |       |        |       | 23 |    | 1.1 |     |
| 24 | 173.1 | 78.5   | 171.3  | 80.9  | -160.7 | 91.4  | 168.8  | -56.0 | 21 | 25 | 1.0 | 1.0 |
| 25 | -64.3 | -62.2  | -55.0  | -84.2 |        |       |        |       | 21 |    | 1.0 |     |
| 25 |       |        |        |       | 177.9  | 111.2 | 69.0   | 173.0 |    | 23 |     | 0.9 |
| 26 | -46.7 | -64.8  | -164.6 | 73.7  | -60.2  | -60.5 | 160.4  | 65.1  | 21 | 27 | 1.0 | 1.1 |

LYS

| rotamer | X <sub>1</sub> | X <sub>2</sub> | X <sub>3</sub> | X <sub>4</sub> | X <sub>1</sub> | X <sub>2</sub> | X <sub>3</sub> | X <sub>4</sub> | rotamer occupancy |     | rotamer share, % |      |
|---------|----------------|----------------|----------------|----------------|----------------|----------------|----------------|----------------|-------------------|-----|------------------|------|
|         | U              |                |                |                | B              |                |                |                | U                 | B   | U                | B    |
| 1       | -65.5          | -178.1         | 179.5          | -179.8         | -66.1          | -178.3         | 178.0          | 179.2          | 702               | 756 | 20.7             | 19.2 |
| 2       | -178.3         | -177.7         | 178.1          | -179.0         | -177.8         | -179.5         | 179.2          | -178.8         | 360               | 433 | 10.6             | 11.0 |
| 3       | -65.9          | -62.9          | -178.5         | -177.4         | -67.3          | -65.7          | -177.7         | 177.5          | 202               | 247 | 6.0              | 6.3  |
| 4       | -60.3          | 178.9          | 179.5          | 62.0           | -63.4          | -177.7         | -174.7         | 59.7           | 154               | 185 | 4.5              | 4.7  |
| 5       | -60.1          | -179.7         | -174.9         | -61.4          | -62.7          | -179.5         | -178.3         | -60.0          | 146               | 164 | 4.3              | 4.2  |
| 6       | -71.9          | -167.2         | -69.2          | -175.8         | -73.5          | -172.6         | -68.9          | -172.6         | 113               | 132 | 3.3              | 3.3  |
| 7       | -178.7         | 176.4          | -178.7         | -64.6          | -178.1         | 176.2          | -175.5         | -68.0          | 106               | 124 | 3.1              | 3.1  |
| 8       | 64.9           | 179.2          | 176.9          | -177.6         | 63.3           | -179.9         | -174.0         | -179.9         | 100               | 106 | 2.9              | 2.7  |
| 9       | -61.3          | -179.1         | 64.6           | -179.8         | -66.4          | -178.9         | 64.2           | -179.5         | 99                | 133 | 2.9              | 3.4  |
| 10      | -174.7         | 174.6          | 179.4          | 56.9           | 178.8          | 175.0          | 173.8          | 58.4           | 95                | 120 | 2.8              | 3.0  |
| 11      | -178.2         | 173.5          | 67.7           | 172.6          | -171.4         | 177.0          | 64.7           | -179.7         | 87                | 104 | 2.6              | 2.6  |
| 12      | 179.4          | 67.1           | 174.1          | 178.8          | -175.7         | 60.3           | -178.4         | -179.9         | 92                | 125 | 2.7              | 3.2  |
| 13      | -57.5          | -60.4          | -169.9         | -62.3          | -55.2          | -59.7          | -176.1         | -60.3          | 68                | 70  | 2.0              | 1.8  |
| 14      | -178.8         | -168.1         | -63.6          | 179.3          | 178.2          | 178.6          | -65.2          | -174.6         | 67                | 85  | 2.0              | 2.2  |
| 15      | -68.7          | -69.0          | -172.6         | 62.9           | -56.8          | -69.6          | -174.4         | 53.7           | 61                | 82  | 1.8              | 2.1  |
| 16      | -60.7          | -67.0          | -57.4          | -178.2         | -54.7          | -62.8          | -67.3          | 180.0          | 37                | 38  | 1.1              | 1.0  |
| 17      | 67.0           | -179.1         | -169.6         | -54.0          |                |                |                |                | 36                |     | 1.1              |      |
|         |                |                |                |                | -175.8         | 72.4           | 176.5          | -66.4          |                   | 39  |                  | 1.0  |
| 18      | -169.4         | 176.3          | -21.3          | -63.5          |                |                |                |                | 35                |     | 1.0              |      |
|         |                |                |                |                | 52.5           | 176.3          | -71.6          | -171.5         |                   | 36  |                  | 0.9  |
| 19      | 61.1           | 171.8          | 67.3           | 176.7          |                |                |                |                | 33                |     | 1.0              |      |
|         |                |                |                |                | -65.8          | -175.4         | -65.3          | -65.0          |                   | 38  |                  | 1.0  |
| 20      | 174.7          | 60.8           | 164.9          | 59.0           | -179.6         | 61.1           | -178.5         | 57.4           | 36                | 40  | 1.1              | 1.0  |
| 21      | 179.3          | -178.3         | 71.6           | 66.4           |                |                |                |                | 30                |     | 0.9              |      |

## NON-INTERFACE SURFACE LIBRARY

### CYS

| rotamer | $X_1$  |        | rotamer occupancy |     | rotamer share, % |      |
|---------|--------|--------|-------------------|-----|------------------|------|
|         | U      | B      | U                 | B   | U                | B    |
| 1       | -65.6  | -62.1  | 109               | 103 | 59.6             | 54.2 |
| 2       | -173.9 | -173.4 | 42                | 38  | 23.0             | 20.0 |
| 3       | 65.1   | 61.3   | 32                | 46  | 17.5             | 24.2 |

### SER

| rotamer | $X_1$ |       | rotamer occupancy |      | rotamer share, % |      |
|---------|-------|-------|-------------------|------|------------------|------|
|         | U     | B     | U                 | B    | U                | B    |
| 1       | 61.8  | 61.0  | 1218              | 1487 | 50.6             | 50.7 |
| 2       | -62.8 | -62.0 | 721               | 858  | 29.9             | 29.2 |
| 3       | 177.5 | 179.3 | 470               | 589  | 19.5             | 20.1 |

### THR

| rotamer | $X_1$  |        | rotamer occupancy |      | rotamer share, % |      |
|---------|--------|--------|-------------------|------|------------------|------|
|         | U      | B      | U                 | B    | U                | B    |
| 1       | 61.0   | 61.3   | 1026              | 1166 | 50.8             | 49.1 |
| 2       | -61.4  | -59.4  | 830               | 1035 | 41.1             | 43.6 |
| 3       | -174.7 | -176.3 | 162               | 174  | 8.0              | 7.3  |

### VAL

| rotamer | $X_1$ |       | rotamer occupancy |     | rotamer share, % |      |
|---------|-------|-------|-------------------|-----|------------------|------|
|         | U     | B     | U                 | B   | U                | B    |
| 1       | 177.7 | 177.4 | 692               | 783 | 69.0             | 70.2 |
| 2       | -60.5 | -62.1 | 212               | 229 | 21.1             | 20.5 |
| 3       | 61.7  | 67.6  | 95                | 91  | 9.5              | 8.2  |

### ASP

| rotamer | $X_1$  | $X_2$ | $X_1$  | $X_2$ | rotamer occupancy |      | rotamer share, % |      |
|---------|--------|-------|--------|-------|-------------------|------|------------------|------|
|         | U      |       | B      |       | U                 | B    | U                | B    |
| 1       | -72.0  | -14.7 | -70.4  | -16.2 | 1037              | 1162 | 42.4             | 40.7 |
| 2       | -174.4 | 8.2   | -172.3 | 56.2  | 468               | 463  | 19.1             | 16.2 |
| 3       | 63.6   | 1.6   | 60.8   | -6.3  | 340               | 305  | 13.9             | 10.7 |
| 4       | -173.1 | -19.6 | -173.3 | -10.9 | 235               | 340  | 9.6              | 11.9 |
| 5       | -66.2  | -76.3 | -78.2  | 11.8  | 210               | 323  | 8.6              | 11.3 |
| 6       | 62.0   | -69.0 | 60.0   | -55.1 | 157               | 257  | 6.4              | 9.0  |



## PHE

| rotamer | X <sub>1</sub> | X <sub>2</sub> | X <sub>1</sub> | X <sub>2</sub> | rotamer occupancy |     | rotamer share, % |      |
|---------|----------------|----------------|----------------|----------------|-------------------|-----|------------------|------|
|         | U              |                | B              |                | U                 | B   | U                | B    |
| 1       | -62.1          | 99.1           | -62.3          | 102.8          | 204               | 224 | 44.6             | 46.0 |
| 2       | -177.6         | 76.3           | -180.0         | 75.3           | 169               | 167 | 37.0             | 34.3 |
| 3       | 61.4           | 87.5           | 66.6           | 94.0           | 45                | 53  | 9.8              | 10.9 |
| 4       | -68.1          | -11.9          | -68.0          | -23.1          | 38                | 41  | 8.3              | 8.4  |

## HIS

| rotamer | X <sub>1</sub> | X <sub>2</sub> | X <sub>1</sub> | X <sub>2</sub> | rotamer occupancy |     | rotamer share, % |      |
|---------|----------------|----------------|----------------|----------------|-------------------|-----|------------------|------|
|         | U              |                | B              |                | U                 | B   | U                | B    |
| 1       | -62.6          | -67.6          | -56.0          | -62.2          | 184               | 202 | 27.0             | 27.3 |
| 2       | -66.5          | 88.5           | -63.1          | 92.4           | 133               | 128 | 19.5             | 17.3 |
| 3       | 176.7          | 68.9           | 176.0          | 75.2           | 90                | 113 | 13.2             | 15.2 |
| 4       | -175.1         | -82.1          | 178.1          | -81.2          | 85                | 70  | 12.5             | 9.4  |
| 5       | -72.4          | 172.5          | -74.2          | 171.7          | 54                | 68  | 7.9              | 9.2  |
| 6       | 66.5           | -70.8          | 61.4           | -65.7          | 56                | 57  | 8.2              | 7.7  |
| 7       | 56.7           | 89.0           | 72.4           | 91.8           | 29                | 31  | 4.3              | 4.2  |
| 8       | -168.1         | -168.9         | -164.8         | -174.0         | 25                | 26  | 3.7              | 3.5  |
| 9       | -70.0          | -5.8           | -71.4          | -35.2          | 21                | 35  | 3.1              | 4.7  |

## ILE

| rotamer | X <sub>1</sub> | X <sub>2</sub> | X <sub>1</sub> | X <sub>2</sub> | rotamer occupancy |     | rotamer share, % |      |
|---------|----------------|----------------|----------------|----------------|-------------------|-----|------------------|------|
|         | U              |                | B              |                | U                 | B   | U                | B    |
| 1       | -63.1          | 172.2          | -63.9          | 175.7          | 278               | 306 | 49.6             | 48.0 |
| 2       | -61.4          | -61.8          | -54.6          | -58.1          | 100               | 110 | 17.9             | 17.2 |
| 3       | 65.2           | 174.6          | 62.5           | 173.8          | 74                | 90  | 13.2             | 14.1 |
| 4       | -177.5         | 176.6          | -176.2         | 171.9          | 35                | 34  | 6.3              | 5.3  |
| 5       | -55.8          | 75.0           | -59.9          | 79.7           | 31                | 45  | 5.5              | 7.1  |
| 6       | 50.9           | 66.5           | 82.5           | 101.3          | 14                | 13  | 2.5              | 2.0  |
| 7       | -177.2         | 62.0           | -179.8         | 65.4           | 14                | 28  | 2.5              | 4.4  |

## LEU

| rotamer | X <sub>1</sub> | X <sub>2</sub> | X <sub>1</sub> | X <sub>2</sub> | rotamer occupancy |     | rotamer share, % |      |
|---------|----------------|----------------|----------------|----------------|-------------------|-----|------------------|------|
|         | U              |                | B              |                | U                 | B   | U                | B    |
| 1       | -61.9          | 175.9          | -65.1          | 175.2          | 625               | 703 | 57.1             | 55.9 |
| 2       | -178.3         | 60.3           | -179.6         | 65.3           | 247               | 267 | 22.6             | 21.2 |
| 3       | -78.0          | 48.0           | -80.7          | 51.6           | 79                | 105 | 7.2              | 8.3  |
| 4       | -144.1         | -148.8         | -172.0         | 164.7          | 45                | 54  | 4.1              | 4.3  |
| 5       | -70.0          | -57.2          | -72.0          | -44.1          | 28                | 44  | 2.6              | 3.5  |

|    |        |       |        |       |    |    |     |     |
|----|--------|-------|--------|-------|----|----|-----|-----|
| 6  | -167.7 | -82.2 | -174.8 | -94.0 | 18 | 24 | 1.6 | 1.9 |
| 7  | 60.1   | 71.3  | 58.8   | 174.7 | 14 | 21 | 1.3 | 1.7 |
| 8  | 166.4  | 124.7 | 26.3   | 84.7  | 12 | 8  | 1.1 | 0.6 |
| 9  | -42.6  | 109.7 | -59.6  | 74.4  | 10 | 28 | 0.9 | 2.2 |
| 10 | 100.7  | 121.9 |        |       | 12 |    | 1.1 |     |

### ASN

| rotamer | X <sub>1</sub> | X <sub>2</sub> | X <sub>1</sub> | X <sub>2</sub> | rotamer occupancy |     | rotamer share, % |      |
|---------|----------------|----------------|----------------|----------------|-------------------|-----|------------------|------|
|         | U              |                | B              |                | U                 | B   | U                | B    |
| 1       | -64.7          | -47.4          | -61.3          | -47.2          | 739               | 801 | 38.9             | 38.6 |
| 2       | -72.8          | 164.6          | -69.1          | 171.6          | 353               | 407 | 18.6             | 19.6 |
| 3       | -173.3         | 58.0           | -168.8         | 49.6           | 298               | 372 | 15.7             | 17.9 |
| 4       | 59.7           | 26.3           | 55.2           | 50.1           | 217               | 232 | 11.4             | 11.2 |
| 5       | -175.1         | -46.3          | -172.8         | -83.3          | 225               | 192 | 11.8             | 9.3  |

### PRO

| rotamer | X <sub>1</sub> | X <sub>2</sub> | X <sub>1</sub> | X <sub>2</sub> | rotamer occupancy |      | rotamer share, % |      |
|---------|----------------|----------------|----------------|----------------|-------------------|------|------------------|------|
|         | U              |                | B              |                | U                 | B    | U                | B    |
| 1       | -28.2          | 38.4           | -29.1          | 40.4           | 941               | 1117 | 54.5             | 55.1 |
| 2       | 30.8           | -38.7          | 32.1           | -39.2          | 786               | 912  | 45.5             | 44.9 |

### TRP

| rotamer | X <sub>1</sub> | X <sub>2</sub> | X <sub>1</sub> | X <sub>2</sub> | rotamer occupancy |    | rotamer share, % |      |
|---------|----------------|----------------|----------------|----------------|-------------------|----|------------------|------|
|         | U              |                | B              |                | U                 | B  | U                | B    |
| 1       | -61.9          | 87.5           | -68.1          | 86.2           | 76                | 91 | 40.6             | 41.4 |
| 2       | -177.0         | 81.2           | -177.5         | 82.8           | 22                | 36 | 11.8             | 16.4 |
| 3       | 62.5           | -82.4          | 61.4           | -96.4          | 18                | 14 | 9.6              | 6.4  |
| 4       | -65.8          | -8.6           | -76.2          | 0.0            | 18                | 18 | 9.6              | 8.2  |
| 5       | -177.9         | -110.7         | -174.2         | -107.1         | 17                | 26 | 9.1              | 11.8 |
| 6       | -70.5          | -88.4          | -61.8          | -95.6          | 16                | 12 | 8.6              | 5.5  |
| 7       | 62.2           | 84.7           | 61.4           | 81.9           | 14                | 16 | 7.5              | 7.3  |

### TYR

| rotamer | X <sub>1</sub> | X <sub>2</sub> | X <sub>1</sub> | X <sub>2</sub> | rotamer occupancy |     | rotamer share, % |      |
|---------|----------------|----------------|----------------|----------------|-------------------|-----|------------------|------|
|         | U              |                | B              |                | U                 | B   | U                | B    |
| 1       | -62.6          | 93.9           | -66.3          | 96.0           | 322               | 332 | 50.6             | 46.2 |
| 2       | 178.1          | 74.9           | 178.8          | 77.3           | 201               | 268 | 31.6             | 37.3 |
| 3       | 56.2           | 96.6           | 60.4           | 89.8           | 73                | 78  | 11.5             | 10.9 |
| 4       | -68.4          | -1.2           | -63.7          | -27.0          | 36                | 36  | 5.7              | 5.0  |

## GLU

| rotamer | X <sub>1</sub> | X <sub>2</sub> | X <sub>3</sub> | X <sub>1</sub> | X <sub>2</sub> | X <sub>3</sub> | rotamer occupancy |     | rotamer share, % |      |
|---------|----------------|----------------|----------------|----------------|----------------|----------------|-------------------|-----|------------------|------|
|         | U              |                |                | B              |                |                | U                 | B   | U                | B    |
| 1       | -69.1          | 177.7          | -7.2           | -59.6          | -177.0         | -54.5          | 633               | 633 | 21.6             | 19.2 |
| 2       | -67.2          | 176.4          | 51.1           | -73.7          | 179.2          | 53.0           | 355               | 470 | 12.1             | 14.2 |
| 3       | -176.6         | 179.2          | -6.6           | -178.4         | 173.3          | -4.3           | 363               | 455 | 12.4             | 13.8 |
| 4       | -68.7          | -58.0          | -59.1          | -68.4          | -66.7          | -60.0          | 339               | 387 | 11.6             | 11.7 |
| 5       | 176.5          | 170.1          | 42.8           | -176.3         | -178.8         | -55.1          | 260               | 303 | 8.9              | 9.2  |
| 6       | -178.5         | 61.2           | 21.6           | -176.1         | 57.0           | 51.3           | 205               | 219 | 7.0              | 6.6  |
| 7       | -67.5          | 80.2           | 10.4           | -66.3          | 84.6           | -2.8           | 112               | 88  | 3.8              | 2.7  |
| 8       | 57.0           | -177.6         | 54.5           | 63.5           | -93.8          | 25.3           | 120               | 74  | 4.1              | 2.2  |
| 9       | 68.8           | 176.1          | -50.6          | 68.5           | 173.7          | -56.0          | 107               | 142 | 3.6              | 4.3  |
| 10      | -64.6          | -82.2          | 38.2           | -69.6          | -51.1          | 74.2           | 71                | 102 | 2.4              | 3.1  |
| 11      | 65.7           | -90.1          | 35.5           | 64.5           | -174.6         | 0.9            | 57                | 78  | 1.9              | 2.4  |
| 12      | -63.9          | 91.6           | -41.5          | -72.5          | 62.8           | 54.2           | 72                | 120 | 2.5              | 3.6  |
| 13      | -177.1         | -77.9          | -33.5          | -120.4         | -55.9          | -43.1          | 47                | 39  | 1.6              | 1.2  |
| 14      | -168.2         | 69.2           | -62.1          | 176.8          | 72.8           | 3.8            | 32                | 93  | 1.1              | 2.8  |
| 15      | 61.9           | -103.7         | 73.2           |                |                |                | 37                |     | 1.3              |      |

## GLN

| rotamer | X <sub>1</sub> | X <sub>2</sub> | X <sub>3</sub> | X <sub>1</sub> | X <sub>2</sub> | X <sub>3</sub> | rotamer occupancy |     | rotamer share, % |      |
|---------|----------------|----------------|----------------|----------------|----------------|----------------|-------------------|-----|------------------|------|
|         | U              |                |                | B              |                |                | U                 | B   | U                | B    |
| 1       | -61.0          | -171.3         | -46.5          | -58.0          | -176.8         | -46.3          | 280               | 327 | 16.6             | 17.3 |
| 2       | -73.5          | 174.1          | 50.0           | -68.0          | 178.0          | 53.2           | 256               | 223 | 15.2             | 11.8 |
| 3       | -60.6          | -60.0          | -57.7          | -59.6          | -55.5          | -55.9          | 190               | 186 | 11.3             | 9.9  |
| 4       | 175.6          | -174.6         | 60.5           | 177.6          | 177.6          | 53.0           | 128               | 116 | 7.6              | 6.1  |
| 5       | -65.4          | 174.2          | -180.0         | -67.1          | -179.0         | 171.8          | 132               | 128 | 7.8              | 6.8  |
| 6       | -167.7         | 59.8           | 49.5           | -179.3         | 58.2           | 63.0           | 100               | 131 | 5.9              | 6.9  |
| 7       | -175.9         | 178.9          | -58.9          | -174.4         | -175.5         | -55.5          | 95                | 143 | 5.6              | 7.6  |
| 8       | -65.3          | -56.8          | 120.2          | -59.2          | -54.2          | 131.0          | 88                | 109 | 5.2              | 5.8  |
| 9       | 162.3          | -151.7         | 139.7          | 175.6          | 178.0          | 172.9          | 63                | 61  | 3.7              | 3.2  |
| 10      | 69.5           | -177.7         | -57.4          | 63.1           | -179.4         | -55.7          | 41                | 44  | 2.4              | 2.3  |
| 11      | 179.3          | 71.0           | -171.6         | -173.0         | 67.3           | -66.6          | 37                | 68  | 2.2              | 3.6  |
| 12      | -58.9          | 82.7           | 37.5           | -81.6          | 67.8           | 48.6           | 37                | 40  | 2.2              | 2.1  |
| 13      | -158.4         | 72.6           | -52.4          |                |                |                | 29                |     | 1.7              |      |
| 14      | 56.9           | -174.4         | 59.3           | 48.6           | 179.0          | 53.3           | 21                | 42  | 1.2              | 2.2  |
| 15      | 66.8           | -91.3          | 29.1           | 81.8           | -77.7          | 25.8           | 16                | 24  | 0.9              | 1.3  |
| 16      | 41.5           | -172.4         | 179.1          |                |                |                | 13                |     | 0.8              |      |
| 17      | -73.6          | 71.6           | -164.9         | -64.8          | 102.9          | -50.4          | 15                | 33  | 0.9              | 1.7  |

## MET

| rotamer | X <sub>1</sub> | X <sub>2</sub> | X <sub>3</sub> | X <sub>1</sub> | X <sub>2</sub> | X <sub>3</sub> | rotamer occupancy |    | rotamer share, % |      |
|---------|----------------|----------------|----------------|----------------|----------------|----------------|-------------------|----|------------------|------|
|         | U              |                |                | B              |                |                | U                 | B  | U                | B    |
| 1       | -61.0          | -60.7          | -71.0          | -59.4          | -54.3          | -72.4          | 61                | 60 | 19.6             | 18.2 |
| 2       | -68.3          | 179.8          | -87.4          | -59.1          | -171.9         | -78.3          | 41                | 35 | 13.2             | 10.6 |
| 3       | -62.1          | 176.7          | 83.3           | -67.9          | 175.4          | 66.6           | 36                | 45 | 11.6             | 13.7 |
| 4       | 171.9          | 161.1          | 65.2           | -174.6         | -176.9         | 76.2           | 18                | 13 | 5.8              | 4.0  |
| 5       | -58.1          | -61.9          | 106.4          | -69.3          | -62.7          | 108.7          | 23                | 23 | 7.4              | 7.0  |
| 6       | -65.5          | 176.1          | -170.9         | -83.0          | 172.7          | 171.5          | 18                | 13 | 5.8              | 4.0  |
| 7       | -177.2         | -174.8         | -70.0          | -175.1         | 172.3          | -67.7          | 17                | 32 | 5.5              | 9.7  |
| 8       | -169.9         | 60.8           | 79.2           | -174.0         | 60.3           | 72.5           | 14                | 24 | 4.5              | 7.3  |
| 9       | -164.1         | 87.8           | -118.5         |                |                |                | 11                |    | 3.5              |      |
| 9       |                |                |                | 64.3           | 168.6          | 73.7           |                   | 8  |                  | 2.4  |
| 10      | 76.0           | -178.9         | -68.1          | 59.2           | -175.9         | -70.8          | 8                 | 13 | 2.6              | 4.0  |

## ARG

| rotamer | X <sub>1</sub> | X <sub>2</sub> | X <sub>3</sub> | X <sub>4</sub> | X <sub>1</sub> | X <sub>2</sub> | X <sub>3</sub> | X <sub>4</sub> | rotamer occupancy |     | rotamer share, % |     |
|---------|----------------|----------------|----------------|----------------|----------------|----------------|----------------|----------------|-------------------|-----|------------------|-----|
|         | U              |                |                |                | B              |                |                |                | U                 | B   | U                | B   |
| 1       | -59.2          | 177.1          | 179.8          | 179.9          | -59.9          | -175.4         | -179.8         | -177.2         | 182               | 167 | 10.2             | 8.3 |
| 2       | -72.8          | 169.3          | 179.1          | -77.1          | -61.8          | -179.7         | -170.6         | -73.8          | 93                | 105 | 5.2              | 5.2 |
| 3       | -172.9         | 177.3          | -179.7         | 180.0          | -178.6         | -175.8         | 179.4          | -177.3         | 85                | 108 | 4.7              | 5.4 |
| 4       | -62.4          | 165.0          | 80.2           | 167.9          | -49.5          | -169.4         | 75.8           | -170.7         | 96                | 102 | 5.4              | 5.1 |
| 5       | -169.5         | 179.0          | -60.5          | 144.4          | -176.1         | -152.3         | -63.8          | 143.1          | 93                | 91  | 5.2              | 4.5 |
| 6       | -67.9          | 179.0          | -65.6          | 101.9          | -67.6          | 179.2          | -67.6          | 175.7          | 102               | 98  | 5.7              | 4.9 |
| 7       | -70.5          | -170.1         | -65.9          | -89.4          | -75.1          | -162.5         | -68.9          | -77.6          | 81                | 90  | 4.5              | 4.5 |
| 8       | -67.3          | -171.9         | 177.4          | 99.1           | -64.6          | 178.3          | 175.1          | 63.8           | 71                | 84  | 4.0              | 4.2 |
| 9       | -62.4          | -63.4          | 178.2          | -176.1         | -67.1          | -62.0          | 178.7          | 173.3          | 60                | 52  | 3.4              | 2.6 |
| 10      | 178.3          | -169.5         | 56.4           | -162.1         | -175.6         | 162.8          | 51.8           | -175.3         | 78                | 86  | 4.4              | 4.3 |
| 11      | -173.1         | 178.3          | -62.1          | -79.4          | 179.6          | 166.5          | -61.2          | -84.1          | 56                | 50  | 3.1              | 2.5 |
| 12      | 175.8          | 179.0          | 60.9           | 70.1           | -179.2         | 178.2          | 56.5           | 76.2           | 48                | 62  | 2.7              | 3.1 |
| 13      | 177.4          | 178.2          | 173.6          | 75.7           | 176.3          | -173.7         | 179.4          | 65.4           | 33                | 34  | 1.8              | 1.7 |
| 14      | -61.0          | -172.5         | 72.0           | 80.2           | -65.5          | -179.0         | 59.2           | 76.4           | 32                | 33  | 1.8              | 1.6 |
| 15      | 60.2           | -178.3         | 174.5          | 71.5           | 66.2           | -174.3         | 173.6          | 93.9           | 34                | 30  | 1.9              | 1.5 |
| 16      | 173.9          | 175.1          | 173.3          | -78.3          | -168.5         | 165.4          | 172.1          | -72.8          | 31                | 44  | 1.7              | 2.2 |
| 17      | 56.0           | 177.7          | 68.6           | -170.3         | 54.5           | 154.8          | 61.2           | 149.3          | 26                | 28  | 1.5              | 1.4 |
| 18      | 87.1           | -168.5         | -54.6          | 173.6          | 49.4           | -177.4         | -71.4          | -171.5         | 27                | 32  | 1.5              | 1.6 |
| 19      | -179.7         | 51.5           | -179.6         | 168.3          | 179.8          | 71.9           | -168.0         | -177.2         | 24                | 19  | 1.3              | 0.9 |
| 20      | -64.0          | -78.7          | -74.8          | -176.6         | -71.1          | -79.5          | -72.0          | 176.7          | 22                | 44  | 1.2              | 2.2 |
| 21      | 70.7           | -172.8         | 177.4          | -77.5          | 54.8           | 177.9          | -171.8         | -75.8          | 21                | 21  | 1.2              | 1.0 |
| 22      | -59.1          | -70.6          | -173.2         | -75.4          | -69.6          | -64.3          | -179.7         | -92.2          | 23                | 30  | 1.3              | 1.5 |
| 23      | 70.4           | -170.0         | -179.5         | -180.0         | 69.8           | 165.0          | -173.7         | 172.9          | 19                | 30  | 1.1              | 1.5 |
| 24      | -179.7         | 70.2           | -171.1         | 85.1           | 159.8          | 71.7           | -176.6         | -76.6          | 17                | 19  | 0.9              | 0.9 |

|    |       |       |       |       |       |       |       |        |    |    |     |     |
|----|-------|-------|-------|-------|-------|-------|-------|--------|----|----|-----|-----|
| 25 | -64.3 | -62.3 | -55.0 | -84.2 |       |       |       |        | 16 |    | 0.9 |     |
| 25 |       |       |       |       | -60.2 | -60.5 | 160.4 | 65.1   |    | 20 |     | 1.0 |
| 26 |       |       |       |       | 177.6 | 115.5 | 77.1  | -163.6 |    | 19 |     | 0.9 |

LYS

| rotamer | X <sub>1</sub> | X <sub>2</sub> | X <sub>3</sub> | X <sub>4</sub> | X <sub>1</sub> | X <sub>2</sub> | X <sub>3</sub> | X <sub>4</sub> | rotamer occupancy |     | rotamer share, % |      |
|---------|----------------|----------------|----------------|----------------|----------------|----------------|----------------|----------------|-------------------|-----|------------------|------|
|         | U              |                |                |                | B              |                |                |                | U                 | B   | U                | B    |
| 1       | -65.1          | -177.8         | -178.7         | -179.5         | -64.8          | -177.1         | -179.4         | -178.6         | 611               | 648 | 20.6             | 19.1 |
| 2       | -178.3         | -177.7         | 178.1          | -179.0         | -177.8         | -179.5         | 179.2          | -178.8         | 325               | 373 | 11.0             | 11.0 |
| 3       | -65.9          | -62.9          | -178.5         | -177.4         | -67.3          | -65.7          | -177.7         | 177.5          | 176               | 193 | 5.9              | 5.7  |
| 4       | -60.3          | 178.9          | 179.5          | 62.0           | -63.4          | -177.7         | -174.7         | 59.7           | 141               | 163 | 4.8              | 4.8  |
| 5       | -64.8          | 175.3          | -179.3         | -65.3          | -62.7          | -179.5         | -178.3         | -60.0          | 123               | 140 | 4.1              | 4.1  |
| 6       | -178.7         | 176.4          | -178.7         | -64.6          | -178.1         | 176.2          | -175.5         | -68.0          | 97                | 111 | 3.3              | 3.3  |
| 7       | -68.7          | -176.1         | -69.0          | -178.2         | -73.5          | -172.6         | -68.9          | -172.6         | 95                | 113 | 3.2              | 3.3  |
| 8       | -59.7          | 175.4          | 66.6           | 177.6          | -66.4          | -178.9         | 64.2           | -179.5         | 89                | 117 | 3.0              | 3.5  |
| 9       | -179.3         | 178.4          | 176.0          | 58.3           | -171.9         | 174.1          | -177.7         | 59.4           | 85                | 100 | 2.9              | 3.0  |
| 10      | 64.9           | 179.2          | 176.9          | -177.6         | 63.3           | -179.9         | -174.0         | -179.9         | 82                | 89  | 2.8              | 2.6  |
| 11      | 179.4          | 67.1           | 174.1          | 178.8          | -175.7         | 60.3           | -178.4         | -179.9         | 81                | 114 | 2.7              | 3.4  |
| 12      | -178.2         | 173.5          | 67.7           | 172.6          | -171.4         | 177.0          | 64.7           | -179.7         | 75                | 92  | 2.5              | 2.7  |
| 13      | -51.7          | -55.8          | -174.3         | -65.4          | -64.6          | -55.4          | 171.7          | -61.3          | 55                | 54  | 1.9              | 1.6  |
| 14      | -178.8         | -168.1         | -63.6          | 179.3          | 178.2          | 178.6          | -65.2          | -174.6         | 60                | 65  | 2.0              | 1.9  |
| 15      | -68.7          | -69.0          | -172.6         | 62.9           | -56.8          | -69.6          | -174.4         | 53.7           | 54                | 70  | 1.8              | 2.1  |
| 16      | -60.8          | -66.9          | -57.5          | -178.2         | -54.7          | -62.8          | -67.3          | 180.0          | 37                | 32  | 1.2              | 0.9  |
| 17      | 68.0           | -176.2         | -171.5         | -55.9          |                |                |                |                | 33                |     | 1.1              |      |
|         |                |                |                |                | -65.8          | -175.4         | -65.3          | -65.0          |                   | 34  |                  | 1.0  |
| 18      | 61.1           | 171.8          | 67.3           | 176.7          |                |                |                |                | 28                |     | 0.9              |      |
|         |                |                |                |                | -173.7         | 72.7           | 174.5          | -61.6          |                   | 33  |                  | 1.0  |
| 19      | 179.5          | -177.4         | -58.1          | -59.2          |                |                |                |                | 27                |     | 0.9              |      |
| 20      | 174.7          | 60.8           | 164.9          | 59.0           | -179.6         | 61.1           | -178.5         | 57.4           | 34                | 38  | 1.1              | 1.1  |
| 21      | 53.3           | -170.5         | -61.3          | 176.8          | 69.0           | 174.5          | -64.1          | -177.4         | 26                | 29  | 0.9              | 0.9  |

## INTERFACE SURFACE LIBRARY

### CYS

| rotamer | $X_1$  |       | rotamer occupancy |    | rotamer share, % |      |
|---------|--------|-------|-------------------|----|------------------|------|
|         | U      | B     | U                 | B  | U                | B    |
| 1       | -69.8  | -66.2 | 20                | 29 | 50.0             | 50.0 |
| 2       | -179.0 | 178.8 | 11                | 17 | 27.5             | 29.3 |
| 3       | 74.9   | 62.1  | 9                 | 11 | 22.5             | 19.0 |

### SER

| rotamer | $X_1$ |       | rotamer occupancy |     | rotamer share, % |      |
|---------|-------|-------|-------------------|-----|------------------|------|
|         | U     | B     | U                 | B   | U                | B    |
| 1       | 58.1  | 62.7  | 146               | 192 | 43.8             | 44.8 |
| 2       | -61.7 | -58.2 | 102               | 141 | 30.6             | 32.9 |
| 3       | 179.3 | 177.0 | 79                | 91  | 23.7             | 21.2 |

### THR

| rotamer | $X_1$  |        | rotamer occupancy |     | rotamer share, % |      |
|---------|--------|--------|-------------------|-----|------------------|------|
|         | U      | B      | U                 | B   | U                | B    |
| 1       | 62.5   | 55.1   | 171               | 205 | 53.3             | 50.5 |
| 2       | -59.3  | -61.1  | 121               | 163 | 37.7             | 40.1 |
| 3       | -174.3 | -174.0 | 21                | 31  | 6.5              | 7.6  |

### VAL

| rotamer | $X_1$ |       | rotamer occupancy |     | rotamer share, % |      |
|---------|-------|-------|-------------------|-----|------------------|------|
|         | U     | B     | U                 | B   | U                | B    |
| 1       | 173.7 | 177.3 | 110               | 166 | 62.9             | 64.1 |
| 2       | -61.5 | -62.2 | 40                | 64  | 22.9             | 24.7 |
| 3       | 70.4  | 67.9  | 22                | 23  | 12.6             | 8.9  |

### ASP

| rotamer | $X_1$  | $X_2$ | $X_1$  | $X_2$ | rotamer occupancy |     | rotamer share, % |      |
|---------|--------|-------|--------|-------|-------------------|-----|------------------|------|
|         | U      |       | B      |       | U                 | B   | U                | B    |
| 1       | -70.5  | -26.3 | -62.3  | -33.9 | 140               | 192 | 42.6             | 44.3 |
| 2       | -166.4 | 14.5  | -174.7 | 11.6  | 61                | 80  | 18.5             | 18.5 |
| 3       | 61.2   | 0.9   | 63.3   | 10.3  | 45                | 63  | 13.7             | 14.5 |
| 4       | -176.4 | 59.9  | -175.5 | 76.0  | 42                | 42  | 12.8             | 9.7  |

|   |       |      |       |       |    |    |     |     |
|---|-------|------|-------|-------|----|----|-----|-----|
| 5 | -53.6 | 71.8 | -53.4 | -82.2 | 27 | 33 | 8.2 | 7.6 |
| 6 | 44.3  | 44.6 | 56.6  | 87.0  | 14 | 22 | 4.3 | 5.1 |

### PHE

| rotamer | X <sub>1</sub> | X <sub>2</sub> | X <sub>1</sub> | X <sub>2</sub> | rotamer occupancy |    | rotamer share, % |      |
|---------|----------------|----------------|----------------|----------------|-------------------|----|------------------|------|
|         | U              |                | B              |                | U                 | B  | U                | B    |
| 1       | -58.8          | 105.0          | -61.3          | 86.3           | 52                | 86 | 48.1             | 48.9 |
| 2       | 177.6          | 76.4           | 177.0          | 77.4           | 41                | 57 | 38.0             | 32.4 |
| 3       | 51.6           | 76.8           | 60.4           | 81.8           | 13                | 27 | 12.0             | 15.3 |
| 4       |                |                | -66.3          | -18.6          |                   | 5  |                  | 2.8  |

### HIS

| rotamer | X <sub>1</sub> | X <sub>2</sub> | X <sub>1</sub> | X <sub>2</sub> | rotamer occupancy |    | rotamer share, % |      |
|---------|----------------|----------------|----------------|----------------|-------------------|----|------------------|------|
|         | U              |                | B              |                | U                 | B  | U                | B    |
| 1       | -71.1          | 85.6           | -63.3          | 91.1           | 26                | 36 | 20.6             | 20.7 |
| 2       | 78.4           | -101.0         | 72.0           | -93.2          | 26                | 28 | 20.6             | 16.1 |
| 3       | -61.6          | -76.7          | -54.8          | -79.6          | 24                | 43 | 19.0             | 24.7 |
| 4       | -174.6         | 80.9           | -174.5         | 91.6           | 16                | 15 | 12.7             | 8.6  |
| 5       | -62.2          | 137.4          | -74.3          | -167.9         | 12                | 17 | 9.5              | 9.8  |
| 6       | -147.8         | -44.5          | -167.4         | -83.0          | 9                 | 14 | 7.1              | 8.0  |
| 7       | -167.9         | -154.1         | 176.5          | -154.0         | 4                 | 7  | 3.2              | 4.0  |
| 8       | 65.3           | 96.2           | 78.0           | 111.7          | 5                 | 11 | 4.0              | 6.3  |
| 9       | -65.2          | 6.6            |                |                | 3                 |    | 2.4              |      |

### ILE

| rotamer | X <sub>1</sub> | X <sub>2</sub> | X <sub>1</sub> | X <sub>2</sub> | rotamer occupancy |     | rotamer share, % |      |
|---------|----------------|----------------|----------------|----------------|-------------------|-----|------------------|------|
|         | U              |                | B              |                | U                 | B   | U                | B    |
| 1       | -63.1          | 171.4          | -62.3          | 174.9          | 64                | 111 | 47.1             | 55.0 |
| 2       | -60.5          | -57.8          | -57.6          | -62.2          | 25                | 36  | 18.4             | 17.8 |
| 3       | 64.2           | 169.7          | 57.8           | 169.8          | 19                | 21  | 14.0             | 10.4 |
| 4       | -168.1         | 167.8          | 179.6          | 169.7          | 11                | 12  | 8.1              | 5.9  |
| 5       | -170.7         | 61.0           | -171.7         | 70.4           | 5                 | 11  | 3.7              | 5.4  |
| 6       | -106.0         | 71.5           | -34.9          | 84.9           | 4                 | 6   | 2.9              | 3.0  |
| 7       | 28.7           | 104.7          | 60.6           | 70.3           | 6                 | 5   | 4.4              | 2.5  |

## LEU

| rotamer | X <sub>1</sub> | X <sub>2</sub> | X <sub>1</sub> | X <sub>2</sub> | rotamer occupancy |     | rotamer share, % |      |
|---------|----------------|----------------|----------------|----------------|-------------------|-----|------------------|------|
|         | U              |                | B              |                | U                 | B   | U                | B    |
| 1       | -63.4          | 175.9          | -67.7          | 174.3          | 161               | 203 | 65.7             | 58.3 |
| 2       | 179.8          | 57.6           | -179.5         | 61.8           | 47                | 70  | 19.2             | 20.1 |
| 3       | -99.6          | 28.1           | -98.1          | 30.0           | 13                | 28  | 5.3              | 8.0  |
| 4       | -83.1          | -71.6          | -72.5          | -51.6          | 8                 | 10  | 3.3              | 2.9  |
| 5       | -133.1         | -65.3          | -159.8         | -65.8          | 5                 | 4   | 2.0              | 1.1  |
| 6       | 100.6          | 121.9          | -145.0         | -146.8         | 5                 | 15  | 2.0              | 4.3  |
| 7       | -148.3         | -140.5         |                |                | 5                 |     | 2.0              |      |
| 7       |                |                | -84.1          | 109.5          |                   | 9   |                  | 2.6  |
| 8       |                |                | 45.2           | 86.1           |                   | 4   |                  | 1.1  |
| 9       |                |                | 32.3           | 176.6          |                   | 3   |                  | 0.9  |

## ASN

| rotamer | X <sub>1</sub> | X <sub>2</sub> | X <sub>1</sub> | X <sub>2</sub> | rotamer occupancy |     | rotamer share, % |      |
|---------|----------------|----------------|----------------|----------------|-------------------|-----|------------------|------|
|         | U              |                | B              |                | U                 | B   | U                | B    |
| 1       | -66.5          | -50.2          | -68.9          | -37.3          | 124               | 141 | 42.6             | 40.3 |
| 2       | -177.5         | 66.9           | -178.8         | 42.8           | 52                | 53  | 17.9             | 15.1 |
| 3       | -72.7          | 152.3          | -71.3          | 173.0          | 40                | 62  | 13.7             | 17.7 |
| 4       | -166.6         | -51.5          | -178.3         | -79.2          | 34                | 45  | 11.7             | 12.9 |
| 5       | 61.5           | 21.8           | 64.0           | 24.6           | 16                | 30  | 5.5              | 8.6  |

## PRO

| rotamer | X <sub>1</sub> | X <sub>2</sub> | X <sub>1</sub> | X <sub>2</sub> | rotamer occupancy |     | rotamer share, % |      |
|---------|----------------|----------------|----------------|----------------|-------------------|-----|------------------|------|
|         | U              |                | B              |                | U                 | B   | U                | B    |
| 1       | -29.5          | 38.1           | -28.5          | 40.6           | 127               | 151 | 50.8             | 51.2 |
| 2       | 32.3           | -39.5          | 30.2           | -40.8          | 123               | 144 | 49.2             | 48.8 |

## TRP

| rotamer | X <sub>1</sub> | X <sub>2</sub> | X <sub>1</sub> | X <sub>2</sub> | rotamer occupancy |    | rotamer share, % |      |
|---------|----------------|----------------|----------------|----------------|-------------------|----|------------------|------|
|         | U              |                | B              |                | U                 | B  | U                | B    |
| 1       | -63.2          | 93.5           | -71.3          | 85.4           | 21                | 43 | 33.3             | 43.0 |
| 2       | 175.1          | -107.1         | 177.0          | -108.0         | 11                | 13 | 17.5             | 13.0 |
| 3       | -68.2          | -25.0          | -51.3          | -22.7          | 9                 | 11 | 14.3             | 11.0 |
| 4       | -75.8          | -96.4          | -61.7          | -84.8          | 7                 | 4  | 11.1             | 4.0  |
| 5       | 61.4           | 94.2           | 62.4           | 85.2           | 4                 | 4  | 6.3              | 4.0  |
| 6       | -176.2         | 69.2           | -177.7         | 69.5           | 4                 | 9  | 6.3              | 9.0  |
| 7       | 54.6           | -93.0          | 55.7           | -93.3          | 3                 | 14 | 4.8              | 14.0 |



TYR

| rotamer | X <sub>1</sub> | X <sub>2</sub> | X <sub>1</sub> | X <sub>2</sub> | rotamer occupancy |     | rotamer share, % |      |
|---------|----------------|----------------|----------------|----------------|-------------------|-----|------------------|------|
|         | U              |                | B              |                | U                 | B   | U                | B    |
| 1       | -65.0          | 88.8           | -69.2          | 88.2           | 86                | 143 | 42.6             | 48.3 |
| 2       | -174.3         | 70.8           | -179.7         | 74.8           | 69                | 93  | 34.2             | 31.4 |
| 3       | 61.2           | 93.5           | 61.5           | 94.7           | 28                | 37  | 13.9             | 12.5 |
| 4       | -64.8          | 146.4          | -70.9          | -21.1          | 18                | 20  | 8.9              | 6.8  |

GLU

| rotamer | X <sub>1</sub> | X <sub>2</sub> | X <sub>3</sub> | X <sub>1</sub> | X <sub>2</sub> | X <sub>3</sub> | rotamer occupancy |     | rotamer share, % |      |
|---------|----------------|----------------|----------------|----------------|----------------|----------------|-------------------|-----|------------------|------|
|         | U              |                |                | B              |                |                | U                 | B   | U                | B    |
| 1       | -62.1          | -178.4         | -14.1          | -62.9          | 177.9          | 3.5            | 89                | 104 | 21.4             | 19.1 |
| 2       | -177.8         | 177.1          | -7.9           | 178.2          | 174.7          | -13.8          | 66                | 83  | 15.9             | 15.2 |
| 3       | -70.1          | -176.8         | 60.1           | -67.5          | 176.3          | 55.3           | 47                | 69  | 11.3             | 12.7 |
| 4       | 179.9          | 177.2          | 56.5           | -176.4         | -169.4         | -49.3          | 36                | 41  | 8.7              | 7.5  |
| 5       | -58.9          | -69.2          | -46.8          | -70.2          | -64.9          | -76.7          | 32                | 60  | 7.7              | 11.0 |
| 6       | -175.5         | 56.6           | 45.9           | -177.9         | 55.6           | 30.1           | 26                | 26  | 6.3              | 4.8  |
| 7       | 70.7           | -174.0         | 18.6           | 65.7           | -177.7         | 18.6           | 24                | 18  | 5.8              | 3.3  |
| 8       | -58.4          | 48.0           | 62.2           | -72.5          | 76.1           | 23.5           | 19                | 25  | 4.6              | 4.6  |
| 9       | -68.1          | -64.2          | 20.2           | -87.3          | -74.5          | 77.0           | 15                | 14  | 3.6              | 2.6  |
| 10      | 43.7           | 175.3          | -65.0          | 66.5           | 179.8          | -63.0          | 9                 | 17  | 2.2              | 3.1  |
| 11      | 145.6          | 106.7          | -71.9          | -158.3         | 51.5           | -81.4          | 10                | 13  | 2.4              | 2.4  |
| 12      | 68.7           | -94.0          | 28.0           | 70.2           | -85.2          | 39.1           | 6                 | 14  | 1.4              | 2.6  |
| 13      | 28.1           | -72.1          | 0.6            |                |                |                | 3                 |     | 0.7              |      |
|         |                |                |                | 29.4           | 68.8           | 27.1           |                   | 4   |                  | 0.7  |

GLN

| rotamer | X <sub>1</sub> | X <sub>2</sub> | X <sub>3</sub> | X <sub>1</sub> | X <sub>2</sub> | X <sub>3</sub> | rotamer occupancy |    | rotamer share, % |      |
|---------|----------------|----------------|----------------|----------------|----------------|----------------|-------------------|----|------------------|------|
|         | U              |                |                | B              |                |                | U                 | B  | U                | B    |
| 1       | -62.4          | -175.8         | 57.7           | -60.4          | -169.9         | -56.6          | 42                | 53 | 15.7             | 14.8 |
| 2       | -65.1          | -52.3          | -49.2          | -59.5          | -58.3          | -40.2          | 38                | 35 | 14.2             | 9.8  |
| 3       | -61.8          | 179.8          | -55.4          | -65.4          | -174.4         | 53.8           | 36                | 40 | 13.4             | 11.2 |
| 4       | -174.0         | -177.2         | -47.9          | -179.1         | -152.6         | -63.0          | 19                | 23 | 7.1              | 6.4  |
| 5       | -158.3         | 58.8           | 68.6           | -161.4         | 57.6           | 53.0           | 15                | 17 | 5.6              | 4.8  |
| 6       | -80.3          | -155.9         | 173.8          | -72.9          | -172.5         | -142.8         | 13                | 27 | 4.9              | 7.6  |
| 7       | -176.3         | 179.1          | 134.5          | -169.0         | -174.8         | 57.9           | 12                | 29 | 4.5              | 8.1  |
| 8       | 179.3          | 71.0           | -171.5         | -179.0         | 49.9           | -87.8          | 11                | 7  | 4.1              | 2.0  |
| 9       | -59.3          | -95.7          | 101.8          | -63.5          | -63.6          | 153.9          | 8                 | 20 | 3.0              | 5.6  |
| 10      | 75.9           | 176.7          | 75.6           | 53.9           | -164.5         | 50.9           | 6                 | 7  | 2.2              | 2.0  |
| 11      | -76.1          | 77.8           | 7.9            | -83.4          | 79.5           | 23.0           | 6                 | 13 | 2.2              | 3.6  |
| 12      | 46.3           | -172.0         | -95.8          | 44.8           | 169.2          | -68.6          | 6                 | 10 | 2.2              | 2.8  |
| 13      | -173.7         | -109.5         | 55.0           | -173.6         | 174.4          | -173.7         | 4                 | 11 | 1.5              | 3.1  |

|    |       |      |        |       |      |       |   |   |     |     |
|----|-------|------|--------|-------|------|-------|---|---|-----|-----|
| 14 | -68.6 | 74.6 | -170.3 | -64.5 | 91.1 | 136.7 | 3 | 5 | 1.1 | 1.4 |
|----|-------|------|--------|-------|------|-------|---|---|-----|-----|

### MET

| rotamer | X <sub>1</sub> | X <sub>2</sub> | X <sub>3</sub> | X <sub>1</sub> | X <sub>2</sub> | X <sub>3</sub> | rotamer occupancy |    | rotamer share, % |      |
|---------|----------------|----------------|----------------|----------------|----------------|----------------|-------------------|----|------------------|------|
|         | U              |                |                | B              |                |                | U                 | B  | U                | B    |
| 1       | -79.8          | -52.6          | -97.0          | -52.7          | -69.5          | -92.0          | 10                | 23 | 13.7             | 19.3 |
| 2       | -71.4          | 172.1          | -55.2          | -121.3         | -174.6         | -56.0          | 7                 | 11 | 9.6              | 9.2  |
| 3       | -64.5          | 172.5          | 66.1           | -67.0          | 179.7          | 79.5           | 7                 | 21 | 9.6              | 17.6 |
| 4       | -161.5         | 165.1          | 87.7           |                |                |                | 5                 |    | 6.8              |      |
| 4       |                |                |                | -63.8          | -177.9         | -71.8          |                   | 10 |                  | 8.4  |
| 5       | 177.7          | 177.8          | 174.8          |                |                |                | 4                 |    | 5.5              |      |
| 5       |                |                |                | -69.1          | 168.3          | 162.9          |                   | 8  |                  | 6.7  |
| 6       | 53.8           | -148.2         | 17.0           |                |                |                | 4                 |    | 5.5              |      |
| 6       |                |                |                | -78.7          | -59.4          | 104.5          |                   | 6  |                  | 5.0  |

### ARG

| rotamer | X <sub>1</sub> | X <sub>2</sub> | X <sub>3</sub> | X <sub>4</sub> | X <sub>1</sub> | X <sub>2</sub> | X <sub>3</sub> | X <sub>4</sub> | rotamer occupancy |    | rotamer share, % |     |
|---------|----------------|----------------|----------------|----------------|----------------|----------------|----------------|----------------|-------------------|----|------------------|-----|
|         | U              |                |                |                | B              |                |                |                | U                 | B  | U                | B   |
| 1       | -72.0          | 178.5          | 177.0          | -176.7         | -69.9          | 167.0          | 171.6          | -173.0         | 31                | 47 | 9.5              | 9.9 |
| 2       | -72.1          | 140.9          | -174.1         | 86.7           | -61.6          | -158.9         | 179.6          | 84.2           | 24                | 21 | 7.4              | 4.4 |
| 3       | -163.8         | -144.6         | -37.4          | 162.7          | 158.3          | 166.9          | -30.3          | 171.8          | 17                | 17 | 5.2              | 3.6 |
| 4       | -174.7         | 161.7          | -165.9         | 173.1          | -174.4         | 174.4          | -178.6         | 177.3          | 15                | 23 | 4.6              | 4.9 |
| 5       | -54.0          | 175.5          | -174.2         | -78.6          | -72.6          | 170.9          | 171.0          | -74.0          | 15                | 17 | 4.6              | 3.6 |
| 6       | -56.9          | -164.2         | -58.3          | -81.6          | -60.4          | -166.7         | -61.5          | 174.9          | 14                | 28 | 4.3              | 5.9 |
| 7       | -86.2          | 174.2          | -91.7          | 154.1          | -66.8          | -164.6         | -69.0          | -88.8          | 14                | 13 | 4.3              | 2.7 |
| 8       | -62.4          | -57.9          | -172.6         | -174.5         | -60.2          | -69.4          | -168.0         | -174.7         | 13                | 8  | 4.0              | 1.7 |
| 9       | -72.2          | -162.5         | 64.3           | -168.9         | -67.8          | -168.9         | 65.7           | -173.8         | 11                | 22 | 3.4              | 4.6 |
| 10      | -171.7         | 171.8          | 106.6          | -129.7         | -172.5         | 169.6          | 60.6           | -159.6         | 10                | 13 | 3.1              | 2.7 |
| 11      | 102.8          | 172.9          | 171.4          | -153.4         | 179.7          | 100.9          | 175.5          | 162.7          | 9                 | 9  | 2.8              | 1.9 |
| 12      | -69.5          | 170.0          | 91.7           | -106.8         | -65.8          | 172.2          | 58.1           | 92.4           | 8                 | 14 | 2.5              | 3.0 |
| 13      | -46.8          | -64.8          | -164.5         | 73.7           | -58.8          | -71.2          | 176.1          | 55.4           | 7                 | 7  | 2.2              | 1.5 |
| 14      | -177.2         | 174.3          | 165.6          | 75.6           | 177.0          | 178.1          | 175.5          | -67.3          | 7                 | 14 | 2.2              | 3.0 |
| 15      | 176.8          | 73.5           | -168.3         | -175.0         |                |                |                |                | 6                 |    | 1.8              |     |
| 16      | -164.7         | 172.3          | -169.0         | -99.3          |                |                |                |                | 7                 |    | 2.2              |     |
| 16      |                |                |                |                | 71.1           | 176.7          | 177.8          | -75.7          |                   | 10 |                  | 2.1 |
| 17      | -171.0         | -173.3         | -57.2          | -81.9          | 178.3          | 176.6          | -70.2          | -79.0          | 5                 | 14 | 1.5              | 3.0 |
| 18      | 55.0           | -173.0         | 175.6          | 98.1           | 81.8           | 167.6          | 164.9          | 80.0           | 5                 | 9  | 1.5              | 1.9 |
| 19      | 173.1          | 78.5           | 171.3          | 80.9           |                |                |                |                | 4                 |    | 1.2              |     |
| 20      | 173.1          | 65.4           | 64.2           | 82.2           |                |                |                |                | 4                 |    | 1.2              |     |
| 21      | 55.7           | 157.6          | -74.9          | 178.3          | 64.1           | -176.5         | -69.5          | 156.0          | 4                 | 8  | 1.2              | 1.7 |
| 22      | 178.2          | -170.1         | 68.4           | 67.4           | 179.3          | 168.2          | 61.1           | 83.4           | 3                 | 8  | 0.9              | 1.7 |
| 23      | -31.2          | -164.8         | 69.6           | 64.2           |                |                |                |                | 3                 |    | 0.9              |     |
| 24      | -97.7          | -60.2          | -172.1         | -61.0          | -71.3          | -68.8          | -176.3         | -76.5          | 3                 | 12 | 0.9              | 2.5 |

|    |       |       |       |       |       |       |        |       |   |   |     |     |
|----|-------|-------|-------|-------|-------|-------|--------|-------|---|---|-----|-----|
| 25 | -64.2 | -62.3 | -54.9 | -84.3 |       |       |        |       | 3 |   | 0.9 |     |
| 26 | -46.1 | -43.9 | -66.2 | 160.2 | -44.4 | -59.8 | -106.7 | 152.7 | 3 | 5 | 0.9 | 1.1 |

### LYS

| rotamer | X <sub>1</sub> | X <sub>2</sub> | X <sub>3</sub> | X <sub>4</sub> | X <sub>1</sub> | X <sub>2</sub> | X <sub>3</sub> | X <sub>4</sub> | rotamer occupancy |     | rotamer share, % |      |
|---------|----------------|----------------|----------------|----------------|----------------|----------------|----------------|----------------|-------------------|-----|------------------|------|
|         | U              |                |                |                | B              |                |                |                | U                 | B   | U                | B    |
| 1       | -69.3          | -179.7         | 179.2          | -180.0         | -66.5          | 178.8          | 179.6          | 177.2          | 91                | 106 | 21.3             | 19.1 |
| 2       | -173.2         | 179.9          | 179.7          | -176.8         | -175.5         | -179.1         | 175.5          | -174.4         | 42                | 58  | 9.8              | 10.5 |
| 3       | -62.3          | -64.5          | 175.8          | 174.5          | -60.0          | -59.1          | -179.7         | 179.9          | 26                | 45  | 6.1              | 8.1  |
| 4       | -62.6          | -177.7         | 179.8          | -58.1          | -71.2          | -166.9         | -159.0         | -60.5          | 23                | 20  | 5.4              | 3.6  |
| 5       | 66.8           | -179.2         | 180.0          | 173.3          | 63.2           | -179.6         | -179.3         | 177.1          | 16                | 17  | 3.7              | 3.1  |
| 6       | -72.0          | -167.1         | -69.2          | -175.9         | -67.0          | -170.9         | -63.1          | -176.9         | 15                | 20  | 3.5              | 3.6  |
| 7       | -53.2          | -154.3         | 179.3          | 61.0           | -68.7          | -170.5         | -177.8         | 64.9           | 15                | 25  | 3.5              | 4.5  |
| 8       | -179.0         | 171.5          | 62.8           | 171.9          | -136.6         | 173.9          | 77.4           | 146.2          | 12                | 10  | 2.8              | 1.8  |
| 9       | -177.0         | -178.1         | -178.1         | 67.6           | 177.6          | 175.4          | 165.3          | 52.9           | 11                | 16  | 2.6              | 2.9  |
| 10      | -102.5         | -158.3         | 62.4           | -177.4         | -65.3          | 176.5          | 53.6           | -175.9         | 10                | 17  | 2.3              | 3.1  |
| 11      | 175.6          | -179.0         | -177.0         | -70.0          | 177.4          | -159.1         | -176.1         | -48.0          | 9                 | 13  | 2.1              | 2.3  |
| 12      | -169.4         | 176.3          | -21.4          | -63.5          | -109.3         | -173.6         | -87.4          | -46.6          | 8                 | 6   | 1.9              | 1.1  |
| 13      | -86.3          | -69.7          | -177.6         | -52.6          |                |                |                |                | 8                 |     | 1.9              |      |
| 14      | -178.7         | 58.2           | -175.3         | 173.2          | 174.6          | 74.2           | 175.2          | -66.5          | 8                 | 8   | 1.9              | 1.4  |
| 15      | 174.6          | 60.8           | 164.9          | 59.0           | -159.4         | 75.8           | 179.0          | 177.7          | 8                 | 14  | 1.9              | 2.5  |
| 16      | -168.2         | -171.7         | -72.1          | 177.7          | -164.0         | 170.5          | -64.0          | 169.9          | 7                 | 18  | 1.6              | 3.2  |
| 17      | -74.9          | -177.1         | 102.1          | 46.4           | 175.5          | -154.1         | -105.2         | 78.6           | 7                 | 5   | 1.6              | 0.9  |
| 18      | -67.8          | -63.7          | 166.9          | 63.6           | -67.5          | -54.0          | 169.5          | 69.2           | 6                 | 7   | 1.4              | 1.3  |
| 19      | -168.9         | -174.2         | 63.8           | 61.4           |                |                |                |                | 6                 |     | 1.4              |      |
| 19      |                |                |                |                | -62.2          | -101.8         | -158.7         | -69.9          |                   | 13  |                  | 2.3  |
| 20      | 61.1           | 171.8          | 67.3           | 176.7          | 71.1           | 167.7          | 61.5           | -178.3         | 5                 | 7   | 1.2              | 1.3  |
| 21      | -88.7          | -58.4          | -61.6          | 168.9          | -52.5          | -66.7          | -72.6          | -173.1         | 4                 | 6   | 0.9              | 1.1  |
| 22      | 78.3           | -172.7         | 158.0          | 62.8           |                |                |                |                | 4                 |     | 0.9              |      |
| 22      |                |                |                |                | 67.0           | -169.7         | -65.9          | -175.1         |                   | 5   |                  | 0.9  |
| 23      | -141.3         | 95.2           | 60.2           | -167.5         | -159.0         | 53.6           | 57.6           | -175.9         | 4                 | 5   | 0.9              | 0.9  |

**Table S3.** Non-redundant rotamer libraries**FULL SURFACE LIBRARY****CYS**

| rotamer | $X_1$          |                | rotamer occupancy |     | rotamer share, <sup>c</sup> % |      |
|---------|----------------|----------------|-------------------|-----|-------------------------------|------|
|         | U <sup>a</sup> | B <sup>b</sup> | U                 | B   | U                             | B    |
| 1       | -65.6          | -61.0          | 129               | 129 | 57.8                          | 52.0 |
| 2       | -175.3         | -177.3         | 53                | 55  | 23.8                          | 22.2 |
| 3       | 65.3           | 63.4           | 41                | 57  | 18.4                          | 23.0 |

**SER**

| rotamer | $X_1$ |        | rotamer occupancy |      | rotamer share, % |      |
|---------|-------|--------|-------------------|------|------------------|------|
|         | U     | B      | U                 | B    | U                | B    |
| 1       | 61.8  | 62.9   | 1366              | 1683 | 49.8             | 50.0 |
| 2       | -63.6 | -62.0  | 825               | 1000 | 30.1             | 29.7 |
| 3       | 177.6 | -179.5 | 551               | 680  | 20.1             | 20.2 |

**THR**

| rotamer | $X_1$  |        | rotamer occupancy |      | rotamer share, % |      |
|---------|--------|--------|-------------------|------|------------------|------|
|         | U      | B      | U                 | B    | U                | B    |
| 1       | 61.0   | 61.3   | 1197              | 1376 | 51.1             | 49.5 |
| 2       | -59.7  | -59.4  | 953               | 1199 | 40.7             | 43.1 |
| 3       | -174.7 | -178.3 | 192               | 206  | 8.2              | 7.4  |

**VAL**

| rotamer | $X_1$ |       | rotamer occupancy |     | rotamer share, % |      |
|---------|-------|-------|-------------------|-----|------------------|------|
|         | U     | B     | U                 | B   | U                | B    |
| 1       | 177.7 | 177.4 | 802               | 949 | 68.1             | 69.0 |
| 2       | -62.9 | -62.1 | 254               | 293 | 21.6             | 21.3 |
| 3       | 61.7  | 67.9  | 117               | 129 | 9.9              | 9.4  |

<sup>a</sup> Unbound.<sup>b</sup> Bound.

<sup>c</sup> Share of rotamer  $i$  is  $\frac{N_i}{\sum_i N_i + N_{non}}$  100%, where  $N_i$  is rotamer occupancy,  $N_{non}$  is the number of non-rotamer conformations, the sum runs over all rotamers.

PRO

| rotamer | X <sub>1</sub> | X <sub>2</sub> | X <sub>1</sub> | X <sub>2</sub> | rotamer occupancy |      | rotamer share, % |      |
|---------|----------------|----------------|----------------|----------------|-------------------|------|------------------|------|
|         | U              |                | B              |                | U                 | B    | U                | B    |
| 1       | -29.0          | 38.6           | -29.1          | 40.4           | 1076              | 1269 | 54.4             | 54.6 |
| 2       | 30.8           | -38.7          | 30.5           | -39.8          | 901               | 1055 | 45.6             | 45.4 |

TRP

| rotamer | X <sub>1</sub> | X <sub>2</sub> | X <sub>1</sub> | X <sub>2</sub> | rotamer occupancy |     | rotamer share, % |      |
|---------|----------------|----------------|----------------|----------------|-------------------|-----|------------------|------|
|         | U              |                | B              |                | U                 | B   | U                | B    |
| 1       | -61.9          | 87.5           | -68.1          | 86.2           | 98                | 132 | 39.2             | 41.3 |
| 2       | -177.9         | -110.7         | -179.2         | -108.5         | 28                | 40  | 11.2             | 12.5 |
| 3       | -65.8          | -8.6           | -76.2          | 0.0            | 26                | 26  | 10.4             | 8.1  |
| 4       | 177.6          | 74.3           | -177.5         | 82.8           | 26                | 45  | 10.4             | 14.1 |
| 5       | 61.5           | -92.2          | 61.4           | -96.4          | 21                | 28  | 8.4              | 8.8  |
| 6       | -54.4          | -59.9          | -61.8          | -95.6          | 23                | 20  | 9.2              | 6.3  |
| 7       | 60.9           | 92.9           | 64.4           | 82.4           | 16                | 20  | 6.4              | 6.3  |

ASP

| rotamer | X <sub>1</sub> | X <sub>2</sub> | X <sub>1</sub> | X <sub>2</sub> | rotamer occupancy |      | rotamer share, % |      |
|---------|----------------|----------------|----------------|----------------|-------------------|------|------------------|------|
|         | U              |                | B              |                | U                 | B    | U                | B    |
| 1       | -72.0          | -14.7          | -70.4          | -16.2          | 1415              | 1708 | 51.0             | 51.9 |
| 2       | -174.4         | 8.2            | -173.8         | 1.8            | 805               | 932  | 29.0             | 28.3 |
| 3       | 63.6           | 1.6            | 61.3           | 2.2            | 552               | 646  | 19.9             | 19.6 |

PHE

| rotamer | X <sub>1</sub> | X <sub>2</sub> | X <sub>1</sub> | X <sub>2</sub> | rotamer occupancy |     | rotamer share, % |      |
|---------|----------------|----------------|----------------|----------------|-------------------|-----|------------------|------|
|         | U              |                | B              |                | U                 | B   | U                | B    |
| 1       | -62.1          | 99.1           | -62.3          | 102.8          | 294               | 355 | 52.0             | 53.5 |
| 2       | 179.8          | 75.8           | -180.0         | 75.3           | 210               | 224 | 37.2             | 33.8 |
| 3       | 61.4           | 87.5           | 65.4           | 90.7           | 58                | 80  | 10.3             | 12.1 |

HIS

| rotamer | X <sub>1</sub> | X <sub>2</sub> | X <sub>1</sub> | X <sub>2</sub> | rotamer occupancy |     | rotamer share, % |      |
|---------|----------------|----------------|----------------|----------------|-------------------|-----|------------------|------|
|         | U              |                | B              |                | U                 | B   | U                | B    |
| 1       | -62.6          | -67.6          | -60.6          | -70.9          | 457               | 530 | 56.6             | 57.9 |
| 2       | 179.8          | 66.9           | -178.2         | 83.1           | 228               | 248 | 28.2             | 27.1 |
| 3       | 76.1           | -89.5          | 72.0           | -93.2          | 114               | 125 | 14.1             | 13.7 |

ILE

| rotamer | X <sub>1</sub> | X <sub>2</sub> | X <sub>1</sub> | X <sub>2</sub> | rotamer occupancy |     | rotamer share, % |      |
|---------|----------------|----------------|----------------|----------------|-------------------|-----|------------------|------|
|         | U              |                | B              |                | U                 | B   | U                | B    |
| 1       | -63.1          | 172.2          | -63.9          | 175.7          | 502               | 611 | 72.1             | 72.7 |
| 2       | 65.2           | 174.6          | 62.5           | 173.8          | 113               | 129 | 16.2             | 15.4 |
| 3       | -168.6         | 172.6          | -180.0         | 171.0          | 65                | 84  | 9.3              | 10.0 |

LEU

| rotamer | X <sub>1</sub> | X <sub>2</sub> | X <sub>1</sub> | X <sub>2</sub> | rotamer occupancy |      | rotamer share, % |      |
|---------|----------------|----------------|----------------|----------------|-------------------|------|------------------|------|
|         | U              |                | B              |                | U                 | B    | U                | B    |
| 1       | -63.4          | 175.1          | -65.1          | 175.2          | 921               | 1136 | 68.8             | 70.7 |
| 2       | -178.3         | 60.3           | -176.6         | 63.6           | 382               | 428  | 28.5             | 26.6 |
| 3       | 53.9           | 74.5           | 58.8           | 174.7          | 32                | 36   | 2.4              | 2.2  |

ASN

| rotamer | X <sub>1</sub> | X <sub>2</sub> | X <sub>1</sub> | X <sub>2</sub> | rotamer occupancy |      | rotamer share, % |      |
|---------|----------------|----------------|----------------|----------------|-------------------|------|------------------|------|
|         | U              |                | B              |                | U                 | B    | U                | B    |
| 1       | -64.7          | -47.4          | -61.3          | -47.2          | 1249              | 1436 | 57.0             | 59.2 |
| 2       | -173.3         | 58.0           | -168.8         | 49.6           | 622               | 645  | 28.4             | 26.6 |
| 3       | 59.6           | 13.8           | 55.2           | 50.1           | 236               | 262  | 10.8             | 10.8 |

TYR

| rotamer | X <sub>1</sub> | X <sub>2</sub> | X <sub>1</sub> | X <sub>2</sub> | rotamer occupancy |     | rotamer share, % |      |
|---------|----------------|----------------|----------------|----------------|-------------------|-----|------------------|------|
|         | U              |                | B              |                | U                 | B   | U                | B    |
| 1       | -62.6          | 93.9           | -66.3          | 96.0           | 462               | 531 | 55.1             | 52.4 |
| 2       | 178.1          | 74.8           | -179.7         | 74.8           | 270               | 360 | 32.2             | 35.5 |
| 3       | 61.1           | 93.5           | 60.4           | 89.8           | 102               | 115 | 12.2             | 11.3 |

GLU

| rotamer | X <sub>1</sub> | X <sub>2</sub> | X <sub>3</sub> | X <sub>1</sub> | X <sub>2</sub> | X <sub>3</sub> | rotamer occupancy |      | rotamer share, % |      |
|---------|----------------|----------------|----------------|----------------|----------------|----------------|-------------------|------|------------------|------|
|         | U              |                |                | B              |                |                | U                 | B    | U                | B    |
| 1       | -67.6          | 176.4          | -10.0          | -59.6          | -177.0         | -54.5          | 1126              | 1285 | 33.6             | 33.4 |
| 2       | -176.6         | 179.2          | -6.6           | -177.3         | 179.3          | -7.5           | 729               | 887  | 21.8             | 23.1 |
| 3       | -68.7          | -58.0          | -59.1          | -68.4          | -66.7          | -60.0          | 465               | 686  | 13.9             | 17.8 |
| 4       | -178.1         | 62.2           | 24.6           | -177.9         | 58.8           | 48.5           | 275               | 245  | 8.2              | 6.4  |
| 5       | 59.8           | 177.5          | 30.8           | 68.5           | 173.7          | -56.0          | 260               | 251  | 7.8              | 6.5  |
| 6       | -67.5          | 80.2           | 10.4           | -72.5          | 62.8           | 54.2           | 214               | 247  | 6.4              | 6.4  |
| 7       | 65.7           | -90.1          | 35.5           | 59.3           | -75.8          | -2.6           | 109               | 101  | 3.3              | 2.6  |
| 8       | -177.1         | -77.9          | -33.5          | -173.5         | -91.0          | -20.5          | 51                | 37   | 1.5              | 1.0  |

## GLN

| rotamer | X <sub>1</sub> | X <sub>2</sub> | X <sub>3</sub> | X <sub>1</sub> | X <sub>2</sub> | X <sub>3</sub> | rotamer occupancy |     | rotamer share, % |      |
|---------|----------------|----------------|----------------|----------------|----------------|----------------|-------------------|-----|------------------|------|
|         | U              |                |                | B              |                |                | U                 | B   | U                | B    |
| 1       | -62.4          | -170.7         | -50.7          | -61.2          | -179.3         | -55.0          | 764               | 796 | 39.1             | 35.5 |
| 2       | -60.6          | -60.0          | -57.7          | -62.9          | -58.0          | -57.4          | 334               | 431 | 17.1             | 19.2 |
| 3       | 175.6          | -174.6         | 60.5           | -174.4         | -175.5         | -55.5          | 325               | 391 | 16.6             | 17.4 |
| 4       | -167.7         | 59.8           | 49.5           | -174.1         | 54.8           | 60.3           | 192               | 173 | 9.8              | 7.7  |
| 5       | 69.5           | -177.7         | -57.4          | 51.8           | -177.2         | 54.2           | 93                | 132 | 4.8              | 5.9  |
| 6       | -71.6          | 79.6           | 7.0            | -81.6          | 67.8           | 48.6           | 45                | 93  | 2.3              | 4.1  |
| 7       | 55.8           | -95.5          | 30.8           | 71.3           | -91.5          | 35.9           | 19                | 27  | 1.0              | 1.2  |
| 8       | -172.6         | -87.1          | -31.1          |                |                |                | 13                |     | 0.7              |      |

## MET

| rotamer | X <sub>1</sub> | X <sub>2</sub> | X <sub>3</sub> | X <sub>1</sub> | X <sub>2</sub> | X <sub>3</sub> | rotamer occupancy |     | rotamer share, % |      |
|---------|----------------|----------------|----------------|----------------|----------------|----------------|-------------------|-----|------------------|------|
|         | U              |                |                | B              |                |                | U                 | B   | U                | B    |
| 1       | -61.0          | -60.7          | -71.0          | -57.8          | -54.4          | -70.0          | 112               | 115 | 29.2             | 25.7 |
| 2       | -65.6          | 178.2          | -54.5          | -67.9          | 175.4          | 66.6           | 111               | 175 | 28.9             | 39.1 |
| 3       | 171.9          | 161.0          | 65.1           | -174.6         | -176.9         | 76.2           | 45                | 23  | 11.8             | 5.1  |
| 4       | 170.6          | 75.0           | -85.7          | -177.5         | 55.7           | 75.6           | 12                | 29  | 3.1              | 6.5  |
| 5       | 76.0           | -178.9         | -68.1          | 59.2           | -175.9         | -70.8          | 9                 | 25  | 2.3              | 5.6  |

## ARG

| rotamer | X <sub>1</sub> | X <sub>2</sub> | X <sub>3</sub> | X <sub>4</sub> | X <sub>1</sub> | X <sub>2</sub> | X <sub>3</sub> | X <sub>4</sub> | rotamer occupancy |     | rotamer share, % |      |
|---------|----------------|----------------|----------------|----------------|----------------|----------------|----------------|----------------|-------------------|-----|------------------|------|
|         | U              |                |                |                | B              |                |                |                | U                 | B   | U                | B    |
| 1       | -59.2          | 177.1          | 179.8          | 179.9          | -59.9          | -175.4         | -179.8         | -177.2         | 660               | 702 | 31.1             | 28.3 |
| 2       | -172.9         | 177.3          | -179.7         | 180.0          | -179.6         | 177.7          | 180.0          | -178.3         | 141               | 174 | 6.7              | 7.0  |
| 3       | -68.6          | -165.7         | -67.0          | -82.5          | -70.0          | -163.1         | -61.0          | -85.9          | 218               | 230 | 10.3             | 9.2  |
| 4       | -62.4          | -63.4          | 178.2          | -176.1         | -67.1          | -62.0          | 178.7          | 173.3          | 155               | 184 | 7.4              | 7.4  |
| 5       | -171.7         | 171.8          | 106.6          | -129.7         | -172.4         | 174.8          | 61.5           | -171.2         | 201               | 274 | 9.5              | 11   |
| 6       | -177.0         | -179.3         | -68.4          | -92.6          | 179.6          | 166.5          | -61.2          | -84.1          | 99                | 112 | 4.6              | 4.5  |
| 7       | 60.2           | -178.3         | 174.5          | 71.5           | 58.7           | -176.4         | 176.4          | 97.8           | 93                | 79  | 4.4              | 3.2  |
| 8       | -179.7         | 51.5           | -179.6         | 168.3          | 176.5          | 69.0           | -169.7         | -177.7         | 51                | 53  | 2.4              | 2.1  |
| 9       | -64.3          | -62.2          | -55.0          | -84.2          |                |                |                |                | 21                |     | 1.0              |      |
| 9       |                |                |                |                | 177.9          | 111.2          | 69.0           | 173.0          |                   | 23  |                  | 0.9  |

LYS

| rotamer | X <sub>1</sub> | X <sub>2</sub> | X <sub>3</sub> | X <sub>4</sub> | X <sub>1</sub> | X <sub>2</sub> | X <sub>3</sub> | X <sub>4</sub> | rotamer occupancy |      | rotamer share, % |      |
|---------|----------------|----------------|----------------|----------------|----------------|----------------|----------------|----------------|-------------------|------|------------------|------|
|         | U              |                |                |                | B              |                |                |                | U                 | B    | U                | B    |
| 1       | -65.5          | -178.1         | 179.5          | -179.8         | -66.1          | -178.3         | 178.0          | 179.2          | 1275              | 1490 | 37.6             | 37.8 |
| 2       | -178.3         | -177.7         | 178.1          | -179.0         | -177.8         | -179.5         | 179.2          | -178.8         | 780               | 905  | 23.0             | 23.0 |
| 3       | -65.9          | -62.9          | -178.5         | -177.4         | -67.3          | -65.7          | -177.7         | 177.5          | 307               | 355  | 9.1              | 9.0  |
| 4       | 64.9           | 179.2          | 176.9          | -177.6         | 63.3           | -179.9         | -174.0         | -179.9         | 169               | 142  | 5.0              | 3.6  |
| 5       | 179.4          | 67.1           | 174.1          | 178.8          | -175.7         | 60.3           | -178.4         | -179.9         | 128               | 165  | 3.8              | 4.2  |



## NON-INTERFACE SURFACE LIBRARY

### CYS

| rotamer | $X_1$  |        | rotamer occupancy |     | rotamer share, % |      |
|---------|--------|--------|-------------------|-----|------------------|------|
|         | U      | B      | U                 | B   | U                | B    |
| 1       | -65.6  | -62.1  | 109               | 103 | 59.6             | 54.2 |
| 2       | -173.9 | -173.4 | 42                | 38  | 23.0             | 20.0 |
| 3       | 65.1   | 61.3   | 32                | 46  | 17.5             | 24.2 |

### SER

| rotamer | $X_1$ |       | rotamer occupancy |      | rotamer share, % |      |
|---------|-------|-------|-------------------|------|------------------|------|
|         | U     | B     | U                 | B    | U                | B    |
| 1       | 61.8  | 61.0  | 1218              | 1487 | 50.6             | 50.7 |
| 2       | -62.8 | -62.0 | 721               | 858  | 29.9             | 29.2 |
| 3       | 177.5 | 179.3 | 470               | 589  | 19.5             | 20.1 |

### THR

| rotamer | $X_1$  |        | rotamer occupancy |      | rotamer share, % |      |
|---------|--------|--------|-------------------|------|------------------|------|
|         | U      | B      | U                 | B    | U                | B    |
| 1       | 61.0   | 61.3   | 1026              | 1166 | 50.8             | 49.1 |
| 2       | -61.4  | -59.4  | 830               | 1035 | 41.1             | 43.6 |
| 3       | -174.7 | -176.3 | 162               | 174  | 8.0              | 7.3  |

### VAL

| rotamer | $X_1$ |       | rotamer occupancy |     | rotamer share, % |      |
|---------|-------|-------|-------------------|-----|------------------|------|
|         | U     | B     | U                 | B   | U                | B    |
| 1       | 177.7 | 177.4 | 692               | 783 | 69.0             | 70.2 |
| 2       | -60.5 | -62.1 | 212               | 229 | 21.1             | 20.5 |
| 3       | 61.7  | 67.6  | 95                | 91  | 9.5              | 8.2  |

### PRO

| rotamer | $X_1$ | $X_2$ | $X_1$ | $X_2$ | rotamer occupancy |      | rotamer share, % |      |
|---------|-------|-------|-------|-------|-------------------|------|------------------|------|
|         | U     |       | B     |       | U                 | B    | U                | B    |
| 1       | -28.2 | 38.4  | -29.1 | 40.4  | 941               | 1117 | 54.5             | 55.1 |
| 2       | 30.8  | -38.7 | 32.1  | -39.2 | 786               | 912  | 45.5             | 44.9 |

## TRP

| rotamer | X <sub>1</sub> | X <sub>2</sub> | X <sub>1</sub> | X <sub>2</sub> | rotamer occupancy |    | rotamer share, % |      |
|---------|----------------|----------------|----------------|----------------|-------------------|----|------------------|------|
|         | U              |                | B              |                | U                 | B  | U                | B    |
| 1       | -61.9          | 87.5           | -68.1          | 86.2           | 76                | 91 | 40.6             | 41.4 |
| 2       | -177.0         | 81.2           | -177.5         | 82.8           | 22                | 36 | 11.8             | 16.4 |
| 3       | 62.5           | -82.4          | 61.4           | -96.4          | 18                | 14 | 9.6              | 6.4  |
| 4       | -65.8          | -8.6           | -76.2          | 0.0            | 18                | 18 | 9.6              | 8.2  |
| 5       | -177.9         | -110.7         | -174.2         | -107.1         | 17                | 26 | 9.1              | 11.8 |
| 6       | -70.5          | -88.4          | -61.8          | -95.6          | 16                | 12 | 8.6              | 5.5  |
| 7       | 62.2           | 84.7           | 61.4           | 81.9           | 14                | 16 | 7.5              | 7.3  |

## ASP

| rotamer | X <sub>1</sub> | X <sub>2</sub> | X <sub>1</sub> | X <sub>2</sub> | rotamer occupancy |      | rotamer share, % |      |
|---------|----------------|----------------|----------------|----------------|-------------------|------|------------------|------|
|         | U              |                | B              |                | U                 | B    | U                | B    |
| 1       | -72.0          | -14.7          | -70.4          | -16.2          | 1247              | 1485 | 50.9             | 52.0 |
| 2       | -174.4         | 8.2            | -172.3         | 56.2           | 703               | 803  | 28.7             | 28.1 |
| 3       | 63.6           | 1.6            | 60.8           | -6.3           | 497               | 562  | 20.3             | 19.7 |

## PHE

| rotamer | X <sub>1</sub> | X <sub>2</sub> | X <sub>1</sub> | X <sub>2</sub> | rotamer occupancy |     | rotamer share, % |      |
|---------|----------------|----------------|----------------|----------------|-------------------|-----|------------------|------|
|         | U              |                | B              |                | U                 | B   | U                | B    |
| 1       | -62.1          | 99.1           | -62.3          | 102.8          | 242               | 265 | 53.0             | 54.4 |
| 2       | -177.6         | 76.3           | -180.0         | 75.3           | 169               | 167 | 37.0             | 34.3 |
| 3       | 61.4           | 87.5           | 66.6           | 94.0           | 45                | 53  | 9.8              | 10.9 |

## HIS

| rotamer | X <sub>1</sub> | X <sub>2</sub> | X <sub>1</sub> | X <sub>2</sub> | rotamer occupancy |     | rotamer share, % |      |
|---------|----------------|----------------|----------------|----------------|-------------------|-----|------------------|------|
|         | U              |                | B              |                | U                 | B   | U                | B    |
| 1       | -62.6          | -67.6          | -56.0          | -62.2          | 392               | 433 | 57.5             | 58.4 |
| 2       | 176.7          | 68.9           | 176.0          | 75.2           | 200               | 209 | 29.3             | 28.2 |
| 3       | 66.5           | -70.8          | 61.4           | -65.7          | 85                | 88  | 12.5             | 11.9 |

## ILE

| rotamer | X <sub>1</sub> | X <sub>2</sub> | X <sub>1</sub> | X <sub>2</sub> | rotamer occupancy |     | rotamer share, % |      |
|---------|----------------|----------------|----------------|----------------|-------------------|-----|------------------|------|
|         | U              |                | B              |                | U                 | B   | U                | B    |
| 1       | -63.1          | 172.2          | -63.9          | 175.7          | 409               | 461 | 73.0             | 72.3 |
| 2       | 65.2           | 174.6          | 62.5           | 173.8          | 88                | 103 | 15.7             | 16.1 |
| 3       | -177.5         | 176.6          | -176.2         | 171.9          | 49                | 62  | 8.8              | 9.7  |

## LEU

| rotamer | X <sub>1</sub> | X <sub>2</sub> | X <sub>1</sub> | X <sub>2</sub> | rotamer occupancy |     | rotamer share, % |      |
|---------|----------------|----------------|----------------|----------------|-------------------|-----|------------------|------|
|         | U              |                | B              |                | U                 | B   | U                | B    |
| 1       | -61.9          | 175.9          | -65.1          | 175.2          | 742               | 880 | 67.8             | 70.0 |
| 2       | -178.3         | 60.3           | -179.6         | 65.3           | 322               | 345 | 29.5             | 27.4 |
| 3       | 60.1           | 71.3           | 58.8           | 174.7          | 26                | 29  | 2.4              | 2.3  |

## ASN

| rotamer | X <sub>1</sub> | X <sub>2</sub> | X <sub>1</sub> | X <sub>2</sub> | rotamer occupancy |      | rotamer share, % |      |
|---------|----------------|----------------|----------------|----------------|-------------------|------|------------------|------|
|         | U              |                | B              |                | U                 | B    | U                | B    |
| 1       | -64.7          | -47.4          | -61.3          | -47.2          | 1092              | 1208 | 57.4             | 58.2 |
| 2       | -173.3         | 58.0           | -168.8         | 49.6           | 523               | 564  | 27.5             | 27.2 |
| 3       | 59.7           | 26.3           | 55.2           | 50.1           | 217               | 232  | 11.4             | 11.2 |

## TYR

| rotamer | X <sub>1</sub> | X <sub>2</sub> | X <sub>1</sub> | X <sub>2</sub> | rotamer occupancy |     | rotamer share, % |      |
|---------|----------------|----------------|----------------|----------------|-------------------|-----|------------------|------|
|         | U              |                | B              |                | U                 | B   | U                | B    |
| 1       | -62.6          | 93.9           | -66.3          | 96.0           | 358               | 368 | 56.3             | 51.3 |
| 2       | 178.1          | 74.9           | 178.8          | 77.3           | 201               | 268 | 31.6             | 37.3 |
| 3       | 56.2           | 96.6           | 60.4           | 89.8           | 73                | 78  | 11.5             | 10.9 |

## GLU

| rotamer | X <sub>1</sub> | X <sub>2</sub> | X <sub>3</sub> | X <sub>1</sub> | X <sub>2</sub> | X <sub>3</sub> | rotamer occupancy |      | rotamer share, % |      |
|---------|----------------|----------------|----------------|----------------|----------------|----------------|-------------------|------|------------------|------|
|         | U              |                |                | B              |                |                | U                 | B    | U                | B    |
| 1       | -69.1          | 177.7          | -7.2           | -59.6          | -177.0         | -54.5          | 988               | 1103 | 33.7             | 33.4 |
| 2       | -176.6         | 179.2          | -6.6           | -178.4         | 173.3          | -4.3           | 623               | 758  | 21.2             | 22.9 |
| 3       | -68.7          | -58.0          | -59.1          | -68.4          | -66.7          | -60.0          | 442               | 489  | 15.1             | 14.8 |
| 4       | -178.5         | 61.2           | 21.6           | -176.1         | 57.0           | 51.3           | 205               | 351  | 7.0              | 10.6 |
| 5       | -67.5          | 80.2           | 10.4           | -72.5          | 62.8           | 54.2           | 184               | 208  | 6.3              | 6.3  |
| 6       | 57.0           | -177.6         | 54.5           | 68.5           | 173.7          | -56.0          | 227               | 220  | 7.7              | 6.7  |
| 7       | 65.7           | -90.1          | 35.5           | 63.5           | -93.8          | 25.3           | 94                | 74   | 3.2              | 2.2  |
| 8       | -177.1         | -77.9          | -33.5          |                |                |                | 47                |      | 1.6              |      |

## GLN

| rotamer | X <sub>1</sub> | X <sub>2</sub> | X <sub>3</sub> | X <sub>1</sub> | X <sub>2</sub> | X <sub>3</sub> | rotamer occupancy |     | rotamer share, % |      |
|---------|----------------|----------------|----------------|----------------|----------------|----------------|-------------------|-----|------------------|------|
|         | U              |                |                | B              |                |                | U                 | B   | U                | B    |
| 1       | -61.0          | -171.3         | -46.5          | -58.0          | -176.8         | -46.3          | 668               | 678 | 39.6             | 35.9 |
| 2       | -60.6          | -60.0          | -57.7          | -59.6          | -55.5          | -55.9          | 278               | 295 | 16.5             | 15.6 |

|   |        |        |       |        |        |       |     |     |      |      |
|---|--------|--------|-------|--------|--------|-------|-----|-----|------|------|
| 3 | 175.6  | -174.6 | 60.5  | -174.4 | -175.5 | -55.5 | 286 | 320 | 17.0 | 16.9 |
| 4 | -167.7 | 59.8   | 49.5  | -179.3 | 58.2   | 63.0  | 166 | 199 | 9.8  | 10.5 |
| 5 | 69.5   | -177.7 | -57.4 | 48.6   | 179.0  | 53.3  | 75  | 86  | 4.4  | 4.6  |
| 6 | -58.9  | 82.7   | 37.5  | -81.6  | 67.8   | 48.6  | 52  | 73  | 3.1  | 3.9  |
| 7 | 66.8   | -91.3  | 29.1  | 81.8   | -77.7  | 25.8  | 16  | 24  | 0.9  | 1.3  |

### MET

| rotamer | X <sub>1</sub> | X <sub>2</sub> | X <sub>3</sub> | X <sub>1</sub> | X <sub>2</sub> | X <sub>3</sub> | rotamer occupancy |     | rotamer share, % |      |
|---------|----------------|----------------|----------------|----------------|----------------|----------------|-------------------|-----|------------------|------|
|         | U              |                |                | B              |                |                | U                 | B   | U                | B    |
| 1       | -61.0          | -60.7          | -71.0          | -59.4          | -54.3          | -72.4          | 84                | 107 | 27.1             | 32.5 |
| 2       | -68.3          | 179.8          | -87.4          | -67.9          | 175.4          | 66.6           | 95                | 125 | 30.5             | 38.0 |
| 3       | 171.9          | 161.1          | 65.2           | -174.6         | -176.9         | 76.2           | 35                | 13  | 11.2             | 4.0  |
| 4       | -169.9         | 60.8           | 79.2           | -174.0         | 60.3           | 72.5           | 25                | 24  | 8.0              | 7.3  |
| 5       | 76.0           | -178.9         | -68.1          | 59.2           | -175.9         | -70.8          | 8                 | 21  | 2.6              | 6.4  |

### ARG

| rotamer | X <sub>1</sub> | X <sub>2</sub> | X <sub>3</sub> | X <sub>4</sub> | X <sub>1</sub> | X <sub>2</sub> | X <sub>3</sub> | X <sub>4</sub> | rotamer occupancy |     | rotamer share, % |      |
|---------|----------------|----------------|----------------|----------------|----------------|----------------|----------------|----------------|-------------------|-----|------------------|------|
|         | U              |                |                |                | B              |                |                |                | U                 | B   | U                | B    |
| 1       | -59.2          | 177.1          | 179.8          | 179.9          | -59.9          | -175.4         | -179.8         | -177.2         | 561               | 577 | 31.5             | 28.7 |
| 2       | -172.9         | 177.3          | -179.7         | 180.0          | -178.6         | -175.8         | 179.4          | -177.3         | 149               | 186 | 8.2              | 9.3  |
| 3       | -67.9          | 179.0          | -65.6          | 101.9          | -67.6          | 179.2          | -67.6          | 175.7          | 261               | 274 | 14.6             | 13.7 |
| 4       | -62.4          | -63.4          | 178.2          | -176.1         | -67.1          | -62.0          | 178.7          | 173.3          | 83                | 82  | 4.7              | 4.1  |
| 5       | -173.1         | 178.3          | -62.1          | -79.4          | 179.6          | 166.5          | -61.2          | -84.1          | 56                | 50  | 3.1              | 2.5  |
| 6       | 175.8          | 179.0          | 60.9           | 70.1           | -179.2         | 178.2          | 56.5           | 76.2           | 48                | 62  | 2.7              | 3.1  |
| 7       | -61.0          | -172.5         | 72.0           | 80.2           | -65.5          | -179.0         | 59.2           | 76.4           | 32                | 33  | 1.8              | 1.6  |
| 8       | 60.2           | -178.3         | 174.5          | 71.5           | 66.2           | -174.3         | 173.6          | 93.9           | 74                | 81  | 4.2              | 4    |
| 9       | 87.1           | -168.5         | -54.6          | 173.6          | 49.4           | -177.4         | -71.4          | -171.5         | 27                | 32  | 1.5              | 1.6  |
| 10      | -179.7         | 51.5           | -179.6         | 168.3          | 179.8          | 71.9           | -168.0         | -177.2         | 41                | 38  | 2.2              | 1.8  |
| 11      | -64.0          | -78.7          | -74.8          | -176.6         | -71.1          | -79.5          | -72.0          | 176.7          | 38                | 44  | 2.1              | 2.2  |
| 12      |                |                |                |                | -60.2          | -60.5          | 160.4          | 65.1           |                   | 20  |                  | 1.0  |
| 13      |                |                |                |                | 177.6          | 115.5          | 77.1           | -163.6         |                   | 19  |                  | 0.9  |

### LYS

| rotamer | X <sub>1</sub> | X <sub>2</sub> | X <sub>3</sub> | X <sub>4</sub> | X <sub>1</sub> | X <sub>2</sub> | X <sub>3</sub> | X <sub>4</sub> | rotamer occupancy |      | rotamer share, % |      |
|---------|----------------|----------------|----------------|----------------|----------------|----------------|----------------|----------------|-------------------|------|------------------|------|
|         | U              |                |                |                | B              |                |                |                | U                 | B    | U                | B    |
| 1       | -65.1          | -177.8         | -178.7         | -179.5         | -64.8          | -177.1         | -179.4         | -178.6         | 1113              | 1285 | 37.5             | 37.9 |
| 2       | -178.3         | -177.7         | 178.1          | -179.0         | -177.8         | -179.5         | 179.2          | -178.8         | 669               | 741  | 22.6             | 21.9 |
| 3       | -65.9          | -62.9          | -178.5         | -177.4         | -67.3          | -65.7          | -177.7         | 177.5          | 268               | 279  | 9.0              | 8.2  |
| 4       | 64.9           | 179.2          | 176.9          | -177.6         | 63.3           | -179.9         | -174.0         | -179.9         | 169               | 118  | 5.7              | 3.5  |
| 5       | 179.4          | 67.1           | 174.1          | 178.8          | -175.7         | 60.3           | -178.4         | -179.9         | 115               | 185  | 3.9              | 5.5  |

## INTERFACE SURFACE LIBRARY

### CYS

| rotamer | $X_1$  |       | rotamer occupancy |    | rotamer share, % |      |
|---------|--------|-------|-------------------|----|------------------|------|
|         | U      | B     | U                 | B  | U                | B    |
| 1       | -69.8  | -66.2 | 20                | 29 | 50.0             | 50.0 |
| 2       | -179.0 | 178.8 | 11                | 17 | 27.5             | 29.3 |
| 3       | 74.9   | 62.1  | 9                 | 11 | 22.5             | 19.0 |

### SER

| rotamer | $X_1$ |       | rotamer occupancy |     | rotamer share, % |      |
|---------|-------|-------|-------------------|-----|------------------|------|
|         | U     | B     | U                 | B   | U                | B    |
| 1       | 58.1  | 62.7  | 146               | 192 | 43.8             | 44.8 |
| 2       | -61.7 | -58.2 | 102               | 141 | 30.6             | 32.9 |
| 3       | 179.3 | 177.0 | 79                | 91  | 23.7             | 21.2 |

### THR

| rotamer | $X_1$  |        | rotamer occupancy |     | rotamer share, % |      |
|---------|--------|--------|-------------------|-----|------------------|------|
|         | U      | B      | U                 | B   | U                | B    |
| 1       | 62.5   | 55.1   | 171               | 205 | 53.3             | 50.5 |
| 2       | -59.3  | -61.1  | 121               | 163 | 37.7             | 40.1 |
| 3       | -174.3 | -174.0 | 21                | 31  | 6.5              | 7.6  |

### VAL

| rotamer | $X_1$ |       | rotamer occupancy |     | rotamer share, % |      |
|---------|-------|-------|-------------------|-----|------------------|------|
|         | U     | B     | U                 | B   | U                | B    |
| 1       | 173.7 | 177.3 | 110               | 166 | 62.9             | 64.1 |
| 2       | -61.5 | -62.2 | 40                | 64  | 22.9             | 24.7 |
| 3       | 70.4  | 67.9  | 22                | 23  | 12.6             | 8.9  |

### PRO

| rotamer | $X_1$ | $X_2$ | $X_1$ | $X_2$ | rotamer occupancy |     | rotamer share, % |      |
|---------|-------|-------|-------|-------|-------------------|-----|------------------|------|
|         | U     |       | B     |       | U                 | B   | U                | B    |
| 1       | -29.5 | 38.1  | -28.5 | 40.6  | 127               | 151 | 50.8             | 51.2 |
| 2       | 32.3  | -39.5 | 30.2  | -40.8 | 123               | 144 | 49.2             | 48.8 |

## TRP

| rotamer | X <sub>1</sub> | X <sub>2</sub> | X <sub>1</sub> | X <sub>2</sub> | rotamer occupancy |    | rotamer share, % |      |
|---------|----------------|----------------|----------------|----------------|-------------------|----|------------------|------|
|         | U              |                | B              |                | U                 | B  | U                | B    |
| 1       | -63.2          | 93.5           | -71.3          | 85.4           | 21                | 43 | 33.3             | 43.0 |
| 2       | 175.1          | -107.1         | 177.0          | -108.0         | 11                | 13 | 17.5             | 13.0 |
| 3       | -68.2          | -25.0          | -51.3          | -22.7          | 9                 | 11 | 14.3             | 11.0 |
| 4       | -75.8          | -96.4          | -61.7          | -84.8          | 7                 | 4  | 11.1             | 4.0  |
| 5       | 61.4           | 94.2           | 62.4           | 85.2           | 4                 | 4  | 6.3              | 4.0  |
| 6       | -176.2         | 69.2           | -177.7         | 69.5           | 4                 | 9  | 6.3              | 9.0  |
| 7       | 54.6           | -93.0          | 55.7           | -93.3          | 3                 | 14 | 4.8              | 14.0 |

## ASP

| rotamer | X <sub>1</sub> | X <sub>2</sub> | X <sub>1</sub> | X <sub>2</sub> | rotamer occupancy |     | rotamer share, % |      |
|---------|----------------|----------------|----------------|----------------|-------------------|-----|------------------|------|
|         | U              |                | B              |                | U                 | B   | U                | B    |
| 1       | -70.5          | -26.3          | -62.3          | -33.9          | 167               | 225 | 50.8             | 52.0 |
| 2       | -166.4         | 14.5           | -174.7         | 11.6           | 103               | 122 | 31.3             | 28.2 |
| 3       | 61.2           | 0.9            | 63.3           | 10.3           | 59                | 85  | 17.9             | 19.6 |

## PHE

| rotamer | X <sub>1</sub> | X <sub>2</sub> | X <sub>1</sub> | X <sub>2</sub> | rotamer occupancy |    | rotamer share, % |      |
|---------|----------------|----------------|----------------|----------------|-------------------|----|------------------|------|
|         | U              |                | B              |                | U                 | B  | U                | B    |
| 1       | -58.8          | 105.0          | -61.3          | 86.3           | 52                | 91 | 48.1             | 51.7 |
| 2       | 177.6          | 76.4           | 177.0          | 77.4           | 41                | 57 | 38.0             | 32.4 |
| 3       | 51.6           | 76.8           | 60.4           | 81.8           | 13                | 27 | 12.0             | 15.3 |

## HIS

| rotamer | X <sub>1</sub> | X <sub>2</sub> | X <sub>1</sub> | X <sub>2</sub> | rotamer occupancy |    | rotamer share, % |      |
|---------|----------------|----------------|----------------|----------------|-------------------|----|------------------|------|
|         | U              |                | B              |                | U                 | B  | U                | B    |
| 1       | -71.1          | 85.6           | -54.8          | -79.6          | 65                | 96 | 51.6             | 55.2 |
| 2       | 78.4           | -101.0         | 72.0           | -93.2          | 31                | 39 | 24.6             | 22.4 |
| 3       | -174.6         | 80.9           | -174.5         | 91.6           | 29                | 36 | 23.0             | 20.7 |

## ILE

| rotamer | X <sub>1</sub> | X <sub>2</sub> | X <sub>1</sub> | X <sub>2</sub> | rotamer occupancy |     | rotamer share, % |      |
|---------|----------------|----------------|----------------|----------------|-------------------|-----|------------------|------|
|         | U              |                | B              |                | U                 | B   | U                | B    |
| 1       | -63.1          | 171.4          | -62.3          | 174.9          | 93                | 153 | 68.4             | 75.7 |
| 2       | 64.2           | 169.7          | 57.8           | 169.8          | 25                | 26  | 18.4             | 12.9 |
| 3       | -168.1         | 167.8          | 179.6          | 169.7          | 16                | 23  | 11.8             | 11.4 |

## LEU

| rotamer | X <sub>1</sub> | X <sub>2</sub> | X <sub>1</sub> | X <sub>2</sub> | rotamer occupancy |     | rotamer share, % |      |
|---------|----------------|----------------|----------------|----------------|-------------------|-----|------------------|------|
|         | U              |                | B              |                | U                 | B   | U                | B    |
| 1       | -63.4          | 175.9          | -67.7          | 174.3          | 182               | 250 | 74.3             | 71.8 |
| 2       | 179.8          | 57.6           | -179.5         | 61.8           | 57                | 89  | 23.2             | 25.6 |
| 3       | 100.6          | 121.9          | 45.2           | 86.1           | 5                 | 7   | 2.0              | 2.0  |

## ASN

| rotamer | X <sub>1</sub> | X <sub>2</sub> | X <sub>1</sub> | X <sub>2</sub> | rotamer occupancy |     | rotamer share, % |      |
|---------|----------------|----------------|----------------|----------------|-------------------|-----|------------------|------|
|         | U              |                | B              |                | U                 | B   | U                | B    |
| 1       | -66.5          | -50.2          | -68.9          | -37.3          | 164               | 203 | 56.4             | 58.0 |
| 2       | -177.5         | 66.9           | -178.8         | 42.8           | 86                | 98  | 29.6             | 28.0 |
| 3       | 61.5           | 21.8           | 64.0           | 24.6           | 16                | 30  | 5.5              | 8.6  |

## TYR

| rotamer | X <sub>1</sub> | X <sub>2</sub> | X <sub>1</sub> | X <sub>2</sub> | rotamer occupancy |     | rotamer share, % |      |
|---------|----------------|----------------|----------------|----------------|-------------------|-----|------------------|------|
|         | U              |                | B              |                | U                 | B   | U                | B    |
| 1       | -65.0          | 88.8           | -69.2          | 88.2           | 104               | 163 | 51.5             | 55.1 |
| 2       | -174.3         | 70.8           | -179.7         | 74.8           | 69                | 93  | 34.2             | 31.4 |
| 3       | 61.2           | 93.5           | 61.5           | 94.7           | 28                | 37  | 13.9             | 12.5 |

## GLU

| rotamer | X <sub>1</sub> | X <sub>2</sub> | X <sub>3</sub> | X <sub>1</sub> | X <sub>2</sub> | X <sub>3</sub> | rotamer occupancy |     | rotamer share, % |      |
|---------|----------------|----------------|----------------|----------------|----------------|----------------|-------------------|-----|------------------|------|
|         | U              |                |                | B              |                |                | U                 | B   | U                | B    |
| 1       | -62.1          | -178.4         | -14.1          | -62.9          | 177.9          | 3.5            | 136               | 173 | 32.7             | 31.7 |
| 2       | -177.8         | 177.1          | -7.9           | 178.2          | 174.7          | -13.8          | 112               | 124 | 26.9             | 22.8 |
| 3       | -58.9          | -69.2          | -46.8          | -70.2          | -64.9          | -76.7          | 47                | 87  | 11.3             | 16.0 |
| 4       | -175.5         | 56.6           | 45.9           | -177.9         | 55.6           | 30.1           | 26                | 26  | 6.3              | 4.8  |
| 5       | 70.7           | -174.0         | 18.6           | 65.7           | -177.7         | 18.6           | 33                | 35  | 7.9              | 6.4  |
| 6       | -58.4          | 48.0           | 62.2           | -72.5          | 76.1           | 23.5           | 22                | 25  | 5.3              | 4.6  |
| 7       | 68.7           | -94.0          | 28.0           | 70.2           | -85.2          | 39.1           | 6                 | 18  | 1.4              | 3.3  |

## GLN

| rotamer | X <sub>1</sub> | X <sub>2</sub> | X <sub>3</sub> | X <sub>1</sub> | X <sub>2</sub> | X <sub>3</sub> | rotamer occupancy |     | rotamer share, % |      |
|---------|----------------|----------------|----------------|----------------|----------------|----------------|-------------------|-----|------------------|------|
|         | U              |                |                | B              |                |                | U                 | B   | U                | B    |
| 1       | -62.4          | -175.8         | 57.7           | -60.4          | -169.9         | -56.6          | 91                | 120 | 34.0             | 33.6 |
| 2       | -65.1          | -52.3          | -49.2          | -59.5          | -58.3          | -40.2          | 46                | 55  | 17.2             | 15.4 |
| 3       | -174.0         | -177.2         | -47.9          | -169.0         | -174.8         | 57.9           | 35                | 63  | 13.1             | 17.6 |

|   |        |       |      |        |       |       |    |    |     |     |
|---|--------|-------|------|--------|-------|-------|----|----|-----|-----|
| 4 | -158.3 | 58.8  | 68.6 | -161.4 | 57.6  | 53.0  | 26 | 24 | 9.7 | 6.7 |
| 5 | 75.9   | 176.7 | 75.6 | 44.8   | 169.2 | -68.6 | 12 | 17 | 4.5 | 4.8 |
| 6 | -76.1  | 77.8  | 7.9  | -83.4  | 79.5  | 23.0  | 9  | 18 | 3.4 | 5.0 |

### MET

| rotamer | X <sub>1</sub> | X <sub>2</sub> | X <sub>3</sub> | X <sub>1</sub> | X <sub>2</sub> | X <sub>3</sub> | rotamer occupancy |    | rotamer share, % |      |
|---------|----------------|----------------|----------------|----------------|----------------|----------------|-------------------|----|------------------|------|
|         | U              |                |                | B              |                |                | U                 | B  | U                | B    |
| 1       | -79.8          | -52.6          | -97.0          | -52.7          | -69.5          | -92.0          | 10                | 29 | 13.7             | 24.3 |
| 2       | -71.4          | 172.1          | -55.2          | -67.0          | 179.7          | 79.5           | 14                | 39 | 19.2             | 32.7 |
| 3       | -161.5         | 165.1          | 87.7           | -121.3         | -174.6         | -56.0          | 9                 | 11 | 12.3             | 9.2  |
| 4       | 53.8           | -148.2         | 17.0           |                |                |                | 4                 |    | 5.5              |      |

### ARG

| rotamer | X <sub>1</sub> | X <sub>2</sub> | X <sub>3</sub> | X <sub>4</sub> | X <sub>1</sub> | X <sub>2</sub> | X <sub>3</sub> | X <sub>4</sub> | rotamer occupancy |    | rotamer share, % |      |
|---------|----------------|----------------|----------------|----------------|----------------|----------------|----------------|----------------|-------------------|----|------------------|------|
|         | U              |                |                |                | B              |                |                |                | U                 | B  | U                | B    |
| 1       | -72.0          | 178.5          | 177.0          | -176.7         | -69.9          | 167.0          | 171.6          | -173.0         | 67                | 84 | 20.6             | 17.7 |
| 2       | -72.1          | 140.9          | -174.1         | 86.7           | -61.6          | -158.9         | 179.6          | 84.2           | 24                | 21 | 7.4              | 4.4  |
| 3       | -163.8         | -144.6         | -37.4          | 162.7          | 158.3          | 166.9          | -30.3          | 171.8          | 39                | 47 | 12.0             | 9.9  |
| 4       | -174.7         | 161.7          | -165.9         | 173.1          | -174.4         | 174.4          | -178.6         | 177.3          | 48                | 73 | 14.9             | 15.5 |
| 5       | -56.9          | -164.2         | -58.3          | -81.6          | -60.4          | -166.7         | -61.5          | 174.9          | 14                | 28 | 4.3              | 5.9  |
| 6       | -62.4          | -57.9          | -172.6         | -174.5         | -60.2          | -69.4          | -168.0         | -174.7         | 19                | 25 | 5.8              | 6.3  |
| 7       | 176.8          | 73.5           | -168.3         | -175.0         |                |                |                |                | 10                |    | 3.0              |      |
|         |                |                |                |                | 71.1           | 176.7          | 177.8          | -75.7          |                   | 10 |                  | 2.1  |
| 8       | -171.0         | -173.3         | -57.2          | -81.9          | 178.3          | 176.6          | -70.2          | -79.0          | 9                 | 14 | 2.7              | 3.0  |
| 9       | 55.0           | -173.0         | 175.6          | 98.1           | 81.8           | 167.6          | 164.9          | 80.0           | 5                 | 9  | 1.5              | 1.9  |
| 10      | 55.7           | 157.6          | -74.9          | 178.3          | 64.1           | -176.5         | -69.5          | 156.0          | 4                 | 8  | 1.2              | 1.7  |
| 11      | -31.2          | -164.8         | 69.6           | 64.2           |                |                |                |                | 3                 |    | 0.9              |      |
| 12      | -64.2          | -62.3          | -54.9          | -84.3          |                |                |                |                | 3                 |    | 0.9              |      |

### LYS

| rotamer | X <sub>1</sub> | X <sub>2</sub> | X <sub>3</sub> | X <sub>4</sub> | X <sub>1</sub> | X <sub>2</sub> | X <sub>3</sub> | X <sub>4</sub> | rotamer occupancy |     | rotamer share, % |      |
|---------|----------------|----------------|----------------|----------------|----------------|----------------|----------------|----------------|-------------------|-----|------------------|------|
|         | U              |                |                |                | B              |                |                |                | U                 | B   | U                | B    |
| 1       | -69.3          | -179.7         | 179.2          | -180.0         | -66.5          | 178.8          | 179.6          | 177.2          | 155               | 225 | 36.3             | 40.5 |
| 2       | -173.2         | 179.9          | 179.7          | -176.8         | -175.5         | -179.1         | 175.5          | -174.4         | 105               | 110 | 24.6             | 19.8 |
| 3       | -62.3          | -64.5          | 175.8          | 174.5          | -60.0          | -59.1          | -179.7         | 179.9          | 40                | 63  | 9.4              | 11.4 |
| 4       | 66.8           | -179.2         | 180.0          | 173.3          | 63.2           | -179.6         | -179.3         | 177.1          | 25                | 29  | 5.9              | 5.2  |
| 5       | -178.7         | 58.2           | -175.3         | 173.2          | -159.4         | 75.8           | 179.0          | 177.7          | 20                | 14  | 4.7              | 2.5  |



**Table S4.** Number of rotamers in the libraries for different RMSD clustering radii for surface residues with more than one dihedral angle, excluding Pro.

| radius, Å  |         |               | 0.5                | 1  | 1.5 | 2 | 2.5 | 3 | 3.5 | 4 | 4.5 |
|------------|---------|---------------|--------------------|----|-----|---|-----|---|-----|---|-----|
| Amino Acid | Library |               | Number of rotamers |    |     |   |     |   |     |   |     |
| Asp        | Bound   | Full          | 5                  | 3  | 3   | 3 | 3   | 2 | 1   | 1 | 1   |
|            |         | Non-interface | 5                  | 3  | 3   | 3 | 3   | 2 | 1   | 1 | 1   |
|            |         | Interface     | 6                  | 4  | 3   | 3 | 3   | 3 | 1   | 1 | 1   |
|            | Unbound | Full          | 5                  | 3  | 3   | 3 | 3   | 2 | 1   | 1 | 1   |
|            |         | Non-interface | 5                  | 4  | 3   | 3 | 3   | 2 | 1   | 1 | 1   |
|            |         | Interface     | 6                  | 4  | 3   | 3 | 3   | 2 | 1   | 1 | 1   |
| Glu        | Bound   | Full          | 15                 | 9  | 8   | 8 | 6   | 3 | 2   | 1 | 1   |
|            |         | Non-interface | 14                 | 8  | 7   | 7 | 5   | 3 | 2   | 1 | 1   |
|            |         | Interface     | 10                 | 8  | 7   | 7 | 3   | 3 | 2   | 1 | 1   |
|            | Unbound | Full          | 15                 | 10 | 8   | 8 | 5   | 3 | 2   | 2 | 1   |
|            |         | Non-interface | 15                 | 11 | 8   | 8 | 5   | 3 | 2   | 2 | 1   |
|            |         | Interface     | 11                 | 7  | 7   | 6 | 4   | 2 | 2   | 1 | 1   |
| Phe        | Bound   | Full          | 4                  | 3  | 3   | 3 | 3   | 3 | 3   | 3 | 3   |
|            |         | Non-interface | 4                  | 3  | 3   | 3 | 3   | 3 | 3   | 3 | 3   |
|            |         | Interface     | 4                  | 4  | 3   | 3 | 3   | 3 | 3   | 3 | 3   |
|            | Unbound | Full          | 4                  | 3  | 3   | 3 | 3   | 3 | 3   | 3 | 3   |
|            |         | Non-interface | 4                  | 4  | 3   | 3 | 3   | 3 | 3   | 3 | 3   |
|            |         | Interface     | 3                  | 3  | 3   | 3 | 3   | 3 | 3   | 3 | 3   |
| His        | Bound   | Full          | 9                  | 8  | 6   | 3 | 3   | 3 | 3   | 3 | 3   |
|            |         | Non-interface | 9                  | 8  | 6   | 3 | 3   | 3 | 3   | 3 | 3   |
|            |         | Interface     | 8                  | 8  | 6   | 3 | 3   | 3 | 3   | 3 | 3   |
|            | Unbound | Full          | 9                  | 8  | 6   | 3 | 3   | 3 | 3   | 3 | 2   |
|            |         | Non-interface | 9                  | 8  | 6   | 3 | 3   | 3 | 3   | 3 | 3   |
|            |         | Interface     | 9                  | 8  | 6   | 3 | 3   | 3 | 3   | 3 | 2   |
| Ile        | Bound   | Full          | 7                  | 7  | 3   | 3 | 3   | 2 | 1   | 1 | 1   |
|            |         | Non-interface | 7                  | 7  | 3   | 3 | 3   | 2 | 1   | 1 | 1   |
|            |         | Interface     | 7                  | 7  | 4   | 3 | 3   | 2 | 1   | 1 | 1   |
|            | Unbound | Full          | 7                  | 7  | 3   | 3 | 3   | 2 | 1   | 1 | 1   |
|            |         | Non-interface | 7                  | 7  | 3   | 3 | 3   | 2 | 1   | 1 | 1   |
|            |         | Interface     | 7                  | 6  | 3   | 3 | 3   | 1 | 1   | 1 | 1   |
| Lys        | Bound   | Full          | 20                 | 19 | 10  | 6 | 5   | 4 | 3   | 2 | 2   |
|            |         | Non-interface | 20                 | 20 | 11  | 5 | 5   | 4 | 3   | 2 | 2   |
|            |         | Interface     | 22                 | 17 | 10  | 5 | 5   | 4 | 4   | 2 | 1   |
|            | Unbound | Full          | 21                 | 21 | 10  | 6 | 5   | 4 | 3   | 3 | 2   |
|            |         | Non-interface | 21                 | 21 | 12  | 6 | 5   | 4 | 3   | 3 | 2   |
|            |         | Interface     | 23                 | 23 | 11  | 7 | 5   | 4 | 3   | 2 | 2   |
| Leu        | Bound   | Full          | 9                  | 8  | 7   | 5 | 3   | 2 | 1   | 1 | 1   |
|            |         | Non-interface | 9                  | 8  | 8   | 5 | 3   | 2 | 1   | 1 | 1   |
|            |         | Interface     | 9                  | 9  | 6   | 5 | 3   | 2 | 1   | 1 | 1   |
|            | Unbound | Full          | 10                 | 10 | 5   | 5 | 3   | 3 | 1   | 1 | 1   |
|            |         | Non-interface | 10                 | 10 | 6   | 5 | 3   | 3 | 2   | 1 | 1   |
|            |         | Interface     | 7                  | 7  | 7   | 5 | 3   | 2 | 2   | 1 | 1   |
| Met        | Bound   | Full          | 10                 | 10 | 10  | 5 | 4   | 2 | 2   | 2 | 1   |
|            |         | Non-interface | 10                 | 10 | 9   | 4 | 3   | 2 | 2   | 2 | 1   |



**Table S5.** Non-interface (NI) and Interface (I) transition maps.

Cys

| NI | 1    | 2    | 3    | 0.0 |
|----|------|------|------|-----|
| 1  | 50.0 | 4.5  | 1.8  | 0.0 |
| 2  | 4.5  | 13.6 | 2.7  | 0.0 |
| 3  | 0.9  | 0.9  | 17.3 | 0.9 |
|    | 0.0  | 1.8  | 0.9  | 0.0 |

| I | 1    | 2    | 3    | 0.0 |
|---|------|------|------|-----|
| 1 | 50.0 | 5.9  | 2.9  | 0.0 |
| 2 | 2.9  | 20.6 | 2.9  | 0.0 |
| 3 | 0.0  | 0.0  | 14.7 | 0.0 |
|   | 0.0  | 0.0  | 0.0  | 0.0 |

Ser

| NI | 1    | 2    | 3   | 0.0 |
|----|------|------|-----|-----|
| 1  | 39.0 | 7.0  | 5.9 | 0.0 |
| 2  | 7.7  | 17.0 | 4.3 | 0.0 |
| 3  | 5.2  | 4.1  | 9.9 | 0.0 |
|    | 0.0  | 0.0  | 0.0 | 0.0 |

| I | 1    | 2    | 3    | 0.7 |
|---|------|------|------|-----|
| 1 | 28.8 | 7.5  | 5.6  | 0.7 |
| 2 | 11.1 | 17.3 | 3.6  | 0.0 |
| 3 | 5.6  | 6.9  | 10.1 | 0.7 |
|   | 0.7  | 0.7  | 1.0  | 0.0 |

Thr

| NI | 1    | 2    | 3   | 0.0 |
|----|------|------|-----|-----|
| 1  | 40.4 | 8.2  | 2.5 | 0.0 |
| 2  | 7.4  | 31.9 | 2.0 | 0.0 |
| 3  | 2.7  | 2.3  | 2.4 | 0.0 |
|    | 0.0  | 0.0  | 0.0 | 0.0 |

| I | 1    | 2    | 3   | 0.7 |
|---|------|------|-----|-----|
| 1 | 39.5 | 8.8  | 2.4 | 0.3 |
| 2 | 9.5  | 25.9 | 1.4 | 0.7 |
| 3 | 2.4  | 2.0  | 3.7 | 0.0 |
|   | 0.7  | 1.7  | 1.0 | 0.0 |

Val

| NI | 1    | 2    | 3   | 1.2 |
|----|------|------|-----|-----|
| 1  | 50.6 | 7.6  | 3.5 | 1.2 |
| 2  | 4.7  | 18.2 | 1.2 | 1.2 |
| 3  | 3.5  | 2.9  | 3.5 | 0.6 |
|    | 1.2  | 0.0  | 0.0 | 0.0 |

| I | 1    | 2    | 3   | 0.6 |
|---|------|------|-----|-----|
| 1 | 59.5 | 6.3  | 2.7 | 0.6 |
| 2 | 5.5  | 13.4 | 1.6 | 0.4 |
| 3 | 3.3  | 1.8  | 4.7 | 0.1 |
|   | 0.1  | 0.0  | 0.0 | 0.0 |

Pro

| NI | 1    | 2    | 0.0 |
|----|------|------|-----|
| 1  | 40.0 | 15.7 | 0.0 |
| 2  | 14.9 | 29.4 | 0.0 |
|    | 0.0  | 0.0  | 0.0 |

| I | 1    | 2    | 0.0 |
|---|------|------|-----|
| 1 | 38.3 | 14.5 | 0.0 |
| 2 | 14.5 | 32.6 | 0.0 |
|   | 0.0  | 0.0  | 0.0 |

Asp

| NI | 1    | 2    | 3    | 0.1 |
|----|------|------|------|-----|
| 1  | 44.9 | 5.0  | 2.7  | 0.1 |
| 2  | 5.6  | 20.1 | 1.5  | 0.0 |
| 3  | 2.9  | 1.5  | 15.5 | 0.1 |
|    | 0.0  | 0.0  | 0.0  | 0.0 |

| I | 1    | 2    | 3    | 0.3 |
|---|------|------|------|-----|
| 1 | 43.6 | 5.5  | 2.8  | 0.3 |
| 2 | 7.1  | 19.3 | 2.1  | 0.0 |
| 3 | 3.7  | 1.5  | 14.1 | 0.0 |
|   | 0.0  | 0.0  | 0.0  | 0.0 |

Phe

| NI | 1    | 2    | 3   |     |
|----|------|------|-----|-----|
| 1  | 48.7 | 3.1  | 3.1 | 0.3 |
| 2  | 3.4  | 30.5 | 0.3 | 0.0 |
| 3  | 1.4  | 1.4  | 7.4 | 0.0 |
|    | 0.3  | 0.0  | 0.0 | 0.0 |

| I | 1    | 2    | 3   |     |
|---|------|------|-----|-----|
| 1 | 40.6 | 4.7  | 0.9 | 0.9 |
| 2 | 1.9  | 32.1 | 0.0 | 0.0 |
| 3 | 4.7  | 1.9  | 9.4 | 0.0 |
|   | 0.9  | 1.9  | 0.0 | 0.0 |

His

| NI | 1    | 2    | 3   |     |
|----|------|------|-----|-----|
| 1  | 48.6 | 6.8  | 2.4 | 0.2 |
| 2  | 6.6  | 19.9 | 1.0 | 0.8 |
| 3  | 2.7  | 1.7  | 8.6 | 0.0 |
|    | 0.2  | 0.3  | 0.2 | 0.0 |

| I | 1    | 2    | 3    |     |
|---|------|------|------|-----|
| 1 | 46.5 | 3.9  | 7.0  | 0.8 |
| 2 | 3.1  | 14.7 | 0.8  | 0.0 |
| 3 | 3.9  | 3.9  | 14.7 | 0.0 |
|   | 0.8  | 0.0  | 0.0  | 0.0 |

Ile

| NI | 1    | 2   | 3   |     |
|----|------|-----|-----|-----|
| 1  | 64.7 | 4.9 | 2.5 | 0.7 |
| 2  | 4.7  | 8.5 | 1.3 | 0.4 |
| 3  | 4.5  | 0.9 | 4.3 | 0.4 |
|    | 0.9  | 0.4 | 0.4 | 0.4 |

| I | 1    | 2   | 3   |     |
|---|------|-----|-----|-----|
| 1 | 68.3 | 3.2 | 4.0 | 0.0 |
| 2 | 6.3  | 5.6 | 1.6 | 0.0 |
| 3 | 2.4  | 2.4 | 5.6 | 0.0 |
|   | 0.0  | 0.8 | 0.0 | 0.0 |

Leu

| NI | 1    | 2    | 3   |     |
|----|------|------|-----|-----|
| 1  | 60.3 | 5.5  | 1.2 | 0.1 |
| 2  | 8.3  | 21.6 | 0.2 | 0.1 |
| 3  | 0.9  | 0.4  | 1.1 | 0.0 |
|    | 0.0  | 0.0  | 0.0 | 0.2 |

| I | 1    | 2    | 3   |     |
|---|------|------|-----|-----|
| 1 | 59.6 | 7.7  | 0.9 | 0.4 |
| 2 | 10.6 | 16.6 | 0.4 | 0.0 |
| 3 | 1.7  | 0.4  | 0.9 | 0.0 |
|   | 0.9  | 0.0  | 0.0 | 0.0 |

Asn

| NI | 1    | 2    | 3   |     |
|----|------|------|-----|-----|
| 1  | 47.8 | 7.6  | 2.4 | 0.5 |
| 2  | 7.6  | 18.6 | 0.8 | 0.2 |
| 3  | 2.3  | 0.8  | 7.4 | 1.2 |
|    | 0.9  | 0.3  | 1.1 | 0.5 |

| I | 1    | 2    | 3   |     |
|---|------|------|-----|-----|
| 1 | 47.6 | 7.5  | 0.7 | 1.5 |
| 2 | 11.2 | 18.7 | 0.7 | 0.0 |
| 3 | 2.6  | 1.5  | 4.5 | 0.4 |
|   | 1.1  | 0.4  | 0.7 | 0.7 |

Trp

| NI | 1    | 2    | 3   | 4   | 5   | 6   | 7   |
|----|------|------|-----|-----|-----|-----|-----|
| 1  | 33.7 | 2.4  | 0.0 | 0.6 | 1.2 | 0.6 | 0.6 |
| 2  | 0.0  | 12.4 | 0.6 | 0.0 | 1.2 | 0.0 | 0.6 |
| 3  | 0.0  | 0.0  | 4.1 | 0.0 | 0.0 | 0.0 | 1.2 |
| 4  | 3.6  | 0.0  | 0.6 | 8.9 | 0.6 | 0.0 | 0.0 |
| 5  | 0.6  | 0.6  | 0.0 | 0.0 | 5.3 | 0.0 | 0.6 |
| 6  | 1.8  | 1.2  | 0.0 | 1.2 | 0.0 | 3.6 | 0.6 |
| 7  | 0.6  | 0.0  | 0.0 | 0.0 | 0.0 | 0.0 | 6.5 |
|    | 0.0  | 0.0  | 0.0 | 0.0 | 1.2 | 0.0 | 1.8 |

| I | 1    | 2    | 3   | 4   | 5   | 6   | 7   |
|---|------|------|-----|-----|-----|-----|-----|
| 1 | 31.9 | 1.4  | 2.9 | 0.0 | 1.4 | 0.0 | 1.4 |
| 2 | 1.4  | 10.1 | 0.0 | 0.0 | 0.0 | 0.0 | 0.0 |
| 3 | 4.3  | 0.0  | 5.8 | 0.0 | 0.0 | 0.0 | 2.9 |
| 4 | 4.3  | 1.4  | 1.4 | 2.9 | 0.0 | 0.0 | 0.0 |
| 5 | 0.0  | 0.0  | 0.0 | 1.4 | 2.9 | 0.0 | 1.4 |
| 6 | 0.0  | 0.0  | 0.0 | 0.0 | 0.0 | 7.2 | 0.0 |
| 7 | 0.0  | 0.0  | 0.0 | 0.0 | 0.0 | 0.0 | 8.7 |
|   | 2.9  | 0.0  | 0.0 | 0.0 | 0.0 | 1.4 | 0.0 |

Tyr

| NI | 1    | 2    | 3   |     |
|----|------|------|-----|-----|
| 1  | 51.4 | 2.3  | 0.8 | 0.0 |
| 2  | 2.1  | 31.6 | 0.2 | 0.6 |
| 3  | 1.1  | 0.4  | 9.2 | 0.0 |
|    | 0.2  | 0.0  | 0.0 | 0.2 |

| l | 1    | 2    | 3   |     |
|---|------|------|-----|-----|
| 1 | 49.5 | 3.3  | 1.1 | 1.1 |
| 2 | 6.0  | 27.7 | 2.2 | 0.0 |
| 3 | 1.1  | 0.5  | 7.6 | 0.0 |
|   | 0.0  | 0.0  | 0.0 | 0.0 |

Met

| NI | 1    | 2    | 3   | 4   | 5   |     |
|----|------|------|-----|-----|-----|-----|
| 1  | 20.3 | 1.9  | 1.4 | 1.4 | 1.9 | 5.8 |
| 2  | 3.9  | 21.7 | 0.0 | 0.0 | 1.9 | 5.3 |
| 3  | 1.9  | 3.4  | 1.4 | 1.0 | 0.5 | 1.9 |
| 4  | 0.0  | 1.9  | 0.5 | 2.4 | 0.0 | 1.0 |
| 5  | 0.0  | 0.0  | 0.0 | 0.0 | 1.0 | 1.0 |
|    | 2.9  | 3.9  | 0.5 | 0.5 | 1.9 | 6.8 |

| l | 1    | 2    | 3   |      |
|---|------|------|-----|------|
| 1 | 10.8 | 2.7  | 1.4 | 1.4  |
| 2 | 2.7  | 12.2 | 2.7 | 4.1  |
| 3 | 1.4  | 1.4  | 1.4 | 5.4  |
| 4 | 1.4  | 1.4  | 0.0 | 4.1  |
|   | 6.8  | 12.2 | 5.4 | 21.6 |

Glu

| NI | 1    | 2    | 3   | 4   | 5   | 6   | 7   |     |
|----|------|------|-----|-----|-----|-----|-----|-----|
| 1  | 21.8 | 4.0  | 3.3 | 1.6 | 1.1 | 1.2 | 0.2 | 0.7 |
| 2  | 3.8  | 12.6 | 1.3 | 2.0 | 0.7 | 0.7 | 0.1 | 0.9 |
| 3  | 3.2  | 1.1  | 7.6 | 1.9 | 0.6 | 0.5 | 0.1 | 0.4 |
| 4  | 0.8  | 0.5  | 1.0 | 3.7 | 0.4 | 0.2 | 0.1 | 0.2 |
| 5  | 1.1  | 0.7  | 0.6 | 0.4 | 2.3 | 0.5 | 0.3 | 0.3 |
| 6  | 1.0  | 1.3  | 0.6 | 0.2 | 0.4 | 2.8 | 0.3 | 0.4 |
| 7  | 0.4  | 0.3  | 0.2 | 0.2 | 0.5 | 0.2 | 1.1 | 0.4 |
| 8  | 0.3  | 0.3  | 0.1 | 0.5 | 0.1 | 0.0 | 0.0 | 0.2 |
|    | 1.0  | 0.9  | 0.8 | 0.5 | 0.2 | 0.2 | 0.2 | 0.3 |

| l | 1    | 2    | 3   | 4   | 5   | 6   | 7   |     |
|---|------|------|-----|-----|-----|-----|-----|-----|
| 1 | 17.7 | 6.1  | 3.9 | 0.5 | 1.0 | 0.7 | 0.2 | 4.1 |
| 2 | 4.6  | 13.1 | 1.9 | 0.7 | 1.2 | 1.2 | 1.0 | 1.7 |
| 3 | 2.4  | 1.2  | 5.6 | 0.0 | 0.7 | 0.5 | 0.2 | 0.7 |
| 4 | 1.0  | 2.2  | 0.5 | 1.0 | 0.5 | 0.0 | 0.0 | 0.5 |
| 5 | 2.9  | 0.7  | 0.2 | 0.2 | 1.5 | 0.7 | 0.0 | 0.5 |
| 6 | 1.0  | 0.2  | 0.0 | 0.5 | 0.2 | 1.5 | 0.2 | 1.0 |
| 7 | 0.0  | 0.0  | 0.0 | 0.0 | 0.0 | 0.0 | 0.5 | 0.5 |
|   | 2.9  | 1.5  | 1.5 | 1.2 | 0.5 | 0.7 | 0.2 | 2.4 |

Gln

| NI | 1    | 2   | 3   | 4   | 5   | 6   | 7   |     |
|----|------|-----|-----|-----|-----|-----|-----|-----|
| 1  | 25.7 | 3.6 | 2.8 | 1.6 | 0.7 | 1.1 | 0.0 | 3.2 |
| 2  | 3.8  | 8.1 | 0.9 | 1.5 | 0.5 | 0.3 | 0.3 | 1.7 |
| 3  | 3.3  | 1.0 | 8.8 | 1.0 | 0.5 | 0.3 | 0.0 | 2.0 |
| 4  | 1.3  | 1.3 | 0.9 | 5.0 | 0.0 | 0.2 | 0.1 | 1.4 |
| 5  | 1.1  | 0.2 | 0.7 | 0.0 | 1.1 | 0.1 | 0.1 | 0.7 |
| 6  | 0.3  | 0.8 | 0.1 | 0.4 | 0.1 | 0.7 | 0.1 | 0.3 |
| 7  | 0.1  | 0.3 | 0.0 | 0.0 | 0.1 | 0.1 | 0.2 | 0.2 |
|    | 1.7  | 1.5 | 1.2 | 0.8 | 0.7 | 0.9 | 0.2 | 2.3 |

| l | 1    | 2   | 3   | 4   | 5   | 6   |     |
|---|------|-----|-----|-----|-----|-----|-----|
| 1 | 19.3 | 5.4 | 1.2 | 1.5 | 1.2 | 0.4 | 4.2 |
| 2 | 3.9  | 7.7 | 1.9 | 1.2 | 0.8 | 0.4 | 0.4 |
| 3 | 1.5  | 0.0 | 9.3 | 0.4 | 0.0 | 0.0 | 1.9 |
| 4 | 1.5  | 1.2 | 0.8 | 2.3 | 0.0 | 0.4 | 1.5 |
| 5 | 0.8  | 0.8 | 0.4 | 0.0 | 0.8 | 0.0 | 1.2 |
| 6 | 2.3  | 0.0 | 0.0 | 0.4 | 0.0 | 1.5 | 1.2 |
|   | 3.9  | 3.5 | 5.0 | 1.5 | 0.8 | 0.8 | 5.0 |

Lys

| NI | 1    | 2    | 3   | 4   | 5   |     |
|----|------|------|-----|-----|-----|-----|
| 1  | 25.0 | 2.6  | 2.2 | 1.4 | 0.5 | 6.1 |
| 2  | 3.1  | 12.4 | 0.5 | 0.7 | 0.5 | 5.4 |
| 3  | 2.7  | 0.4  | 3.2 | 0.6 | 0.1 | 2.3 |
| 4  | 0.9  | 0.7  | 0.1 | 0.1 | 1.4 | 1.8 |
| 5  | 0.7  | 0.7  | 0.2 | 1.2 | 0.0 | 1.1 |
|    | 6.3  | 4.0  | 2.0 | 1.2 | 0.8 | 6.9 |

| l | 1    | 2   | 3   | 4   | 5   |     |
|---|------|-----|-----|-----|-----|-----|
| 1 | 19.8 | 2.7 | 2.5 | 1.0 | 1.0 | 6.9 |
| 2 | 7.2  | 9.9 | 2.2 | 0.7 | 0.5 | 5.4 |
| 3 | 3.2  | 0.5 | 3.2 | 1.2 | 0.2 | 1.2 |
| 4 | 1.0  | 0.7 | 0.2 | 1.7 | 0.0 | 1.0 |
| 5 | 1.2  | 2.2 | 0.2 | 0.0 | 0.2 | 1.0 |
|   | 6.2  | 4.2 | 2.2 | 0.7 | 0.7 | 6.7 |

Arg

| NI | 1    | 2   | 3   | 4   | 5   | 6   | 7   | 8   | 9   | 10  | 11  | 12  | 13  |     |
|----|------|-----|-----|-----|-----|-----|-----|-----|-----|-----|-----|-----|-----|-----|
| 1  | 15.1 | 1.2 | 3.3 | 1.0 | 1.0 | 0.3 | 0.4 | 0.2 | 0.2 | 0.3 | 0.3 | 0.1 | 0.0 | 7.0 |
| 2  | 1.1  | 4.0 | 1.0 | 0.0 | 0.2 | 0.3 | 0.3 | 0.1 | 0.0 | 0.0 | 0.4 | 0.1 | 0.0 | 1.4 |
| 3  | 3.0  | 0.5 | 6.4 | 0.3 | 0.5 | 0.5 | 0.4 | 0.2 | 0.1 | 0.1 | 0.3 | 0.1 | 0.0 | 2.7 |
| 4  | 0.8  | 0.1 | 0.3 | 1.6 | 0.1 | 0.0 | 0.0 | 0.0 | 0.1 | 0.1 | 0.0 | 0.0 | 0.0 | 1.2 |
| 5  | 1.1  | 0.4 | 0.6 | 0.0 | 1.2 | 0.2 | 0.0 | 0.1 | 0.0 | 0.1 | 0.1 | 0.1 | 0.0 | 0.7 |
| 6  | 0.5  | 0.1 | 0.4 | 0.0 | 0.1 | 0.8 | 0.1 | 0.0 | 0.1 | 0.0 | 0.0 | 0.0 | 0.0 | 0.6 |
| 7  | 0.4  | 0.1 | 0.6 | 0.1 | 0.1 | 0.1 | 1.4 | 0.0 | 0.0 | 0.1 | 0.1 | 0.0 | 0.0 | 1.2 |
| 8  | 0.1  | 0.1 | 0.0 | 0.0 | 0.0 | 0.0 | 0.2 | 0.4 | 0.0 | 0.1 | 0.0 | 0.0 | 0.0 | 0.5 |
| 9  | 0.3  | 0.1 | 0.1 | 0.0 | 0.1 | 0.0 | 0.1 | 0.0 | 0.0 | 0.0 | 0.5 | 0.1 | 0.0 | 0.6 |
| 10 | 0.6  | 0.0 | 0.0 | 0.2 | 0.2 | 0.0 | 0.0 | 0.0 | 0.0 | 0.5 | 0.0 | 0.1 | 0.0 | 0.6 |
| 11 | 0.0  | 0.0 | 0.0 | 0.0 | 0.0 | 0.0 | 0.0 | 0.0 | 0.0 | 0.0 | 0.0 | 0.0 | 0.0 | 0.0 |
|    | 6.2  | 2.2 | 1.9 | 1.1 | 0.8 | 0.5 | 0.8 | 0.4 | 0.3 | 1.0 | 0.5 | 0.5 | 0.0 | 8.6 |

| l  | 1   | 2   | 3   | 4   | 5   | 6   | 7   | 8   | 9   | 10  |     |
|----|-----|-----|-----|-----|-----|-----|-----|-----|-----|-----|-----|
| 1  | 5.8 | 1.2 | 1.4 | 2.6 | 2.6 | 0.9 | 1.2 | 0.3 | 0.3 | 0.0 | 5.8 |
| 2  | 1.4 | 0.9 | 0.3 | 0.9 | 0.3 | 0.0 | 0.0 | 0.3 | 0.0 | 0.3 | 1.4 |
| 3  | 0.9 | 0.6 | 3.5 | 1.7 | 1.2 | 0.6 | 0.0 | 0.0 | 0.3 | 0.0 | 5.2 |
| 4  | 2.3 | 0.6 | 1.4 | 4.6 | 0.3 | 0.6 | 0.0 | 0.6 | 0.3 | 0.6 | 2.9 |
| 5  | 1.4 | 0.0 | 0.0 | 0.9 | 0.3 | 0.0 | 0.0 | 0.0 | 0.0 | 0.0 | 1.4 |
| 6  | 0.6 | 0.3 | 0.3 | 0.6 | 0.6 | 1.7 | 0.0 | 0.0 | 0.0 | 0.0 | 2.3 |
| 7  | 0.0 | 0.0 | 1.2 | 0.3 | 0.0 | 0.0 | 0.0 | 0.0 | 0.0 | 0.0 | 1.4 |
| 8  | 0.3 | 0.0 | 0.3 | 0.3 | 0.0 | 0.0 | 0.0 | 0.0 | 0.0 | 0.0 | 1.2 |
| 9  | 0.0 | 0.0 | 0.3 | 0.0 | 0.0 | 0.0 | 0.0 | 0.3 | 0.3 | 0.0 | 0.6 |
| 10 | 0.3 | 0.0 | 0.0 | 0.0 | 0.0 | 0.0 | 0.0 | 0.3 | 0.0 | 0.6 | 0.0 |
| 11 | 0.3 | 0.0 | 0.0 | 0.0 | 0.0 | 0.0 | 0.0 | 0.0 | 0.0 | 0.0 | 0.3 |
| 12 | 0.0 | 0.0 | 0.0 | 0.0 | 0.0 | 0.0 | 0.0 | 0.0 | 0.0 | 0.0 | 0.3 |
|    | 4.0 | 0.6 | 2.6 | 2.6 | 0.9 | 2.3 | 0.9 | 1.2 | 0.3 | 0.3 | 9.8 |

**Table S6.** Non-interface (NI) and Interface (I) transition matrices.

Cys

| NI | 1    | 2    | 3    | 0.0 |
|----|------|------|------|-----|
| 1  | 88.8 | 8.0  | 3.2  | 0.0 |
| 2  | 21.6 | 65.4 | 13.0 | 0.0 |
| 3  | 4.5  | 4.5  | 86.5 | 4.5 |
|    | 0.0  | 66.7 | 33.3 | 0.0 |

| I | 1    | 2    | 3     | 0.0 |
|---|------|------|-------|-----|
| 1 | 85.0 | 10.0 | 4.9   | 0.0 |
| 2 | 11.0 | 78.0 | 11.0  | 0.0 |
| 3 | 0.0  | 0.0  | 100.0 | 0.0 |
|   | 0.0  | 0.0  | 0.0   | 0.0 |

Ser

| NI | 1    | 2    | 3    | 0.0 |
|----|------|------|------|-----|
| 1  | 75.1 | 13.5 | 11.4 | 0.0 |
| 2  | 26.6 | 58.6 | 14.8 | 0.0 |
| 3  | 27.1 | 21.4 | 51.6 | 0.0 |
|    | 0.0  | 0.0  | 0.0  | 0.0 |

| I | 1    | 2    | 3    | 0.0 |
|---|------|------|------|-----|
| 1 | 67.6 | 17.6 | 13.1 | 1.6 |
| 2 | 34.7 | 54.1 | 11.3 | 0.0 |
| 3 | 24.0 | 29.6 | 43.3 | 3.0 |
|   | 29.2 | 29.2 | 41.7 | 0.0 |

Thr

| NI | 1    | 2    | 3    | 0.0 |
|----|------|------|------|-----|
| 1  | 79.1 | 16.0 | 4.9  | 0.0 |
| 2  | 17.9 | 77.2 | 4.8  | 0.0 |
| 3  | 36.5 | 31.1 | 32.4 | 0.0 |
|    | 0.0  | 0.0  | 0.0  | 0.0 |

| I | 1    | 2    | 3    | 0.0 |
|---|------|------|------|-----|
| 1 | 77.4 | 17.3 | 4.7  | 0.6 |
| 2 | 25.3 | 69.1 | 3.7  | 1.9 |
| 3 | 29.6 | 24.7 | 45.7 | 0.0 |
|   | 20.6 | 50.0 | 29.4 | 0.0 |

Val

| NI | 1     | 2    | 3    | 1.9 |
|----|-------|------|------|-----|
| 1  | 80.4  | 12.1 | 5.6  | 1.9 |
| 2  | 18.6  | 71.9 | 4.7  | 4.7 |
| 3  | 33.3  | 27.6 | 33.3 | 5.7 |
|    | 100.0 | 0.0  | 0.0  | 0.0 |

| I | 1     | 2    | 3    | 0.0 |
|---|-------|------|------|-----|
| 1 | 86.1  | 9.1  | 3.9  | 0.9 |
| 2 | 26.3  | 64.1 | 7.7  | 1.9 |
| 3 | 33.3  | 18.2 | 47.5 | 1.0 |
|   | 100.0 | 0.0  | 0.0  | 0.0 |

Pro

| NI | 1    | 2    | 0.0 |
|----|------|------|-----|
| 1  | 71.8 | 28.2 | 0.0 |
| 2  | 33.6 | 66.4 | 0.0 |
|    | 0.0  | 0.0  | 0.0 |

| I | 1    | 2    | 0.0 |
|---|------|------|-----|
| 1 | 72.5 | 27.5 | 0.0 |
| 2 | 30.8 | 69.2 | 0.0 |
|   | 0.0  | 0.0  | 0.0 |

Asp

| NI | 1    | 2    | 3    | 0.2 |
|----|------|------|------|-----|
| 1  | 85.2 | 9.5  | 5.1  | 0.2 |
| 2  | 20.6 | 73.9 | 5.5  | 0.0 |
| 3  | 14.5 | 7.5  | 77.5 | 0.5 |
|    | 0.0  | 0.0  | 0.0  | 0.0 |

| I | 1    | 2    | 3    | 0.0 |
|---|------|------|------|-----|
| 1 | 83.5 | 10.5 | 5.4  | 0.6 |
| 2 | 24.9 | 67.7 | 7.4  | 0.0 |
| 3 | 19.2 | 7.8  | 73.1 | 0.0 |
|   | 0.0  | 0.0  | 0.0  | 0.0 |

Phe

| NI | 1     | 2    | 3    |     |
|----|-------|------|------|-----|
| 1  | 88.2  | 5.6  | 5.6  | 0.5 |
| 2  | 9.9   | 89.2 | 0.9  | 0.0 |
| 3  | 13.7  | 13.7 | 72.5 | 0.0 |
|    | 100.0 | 0.0  | 0.0  | 0.0 |

| I | 1    | 2    | 3    |     |
|---|------|------|------|-----|
| 1 | 86.2 | 10.0 | 1.9  | 1.9 |
| 2 | 5.6  | 94.4 | 0.0  | 0.0 |
| 3 | 29.4 | 11.9 | 58.8 | 0.0 |
|   | 32.1 | 67.9 | 0.0  | 0.0 |

His

| NI | 1    | 2    | 3    |     |
|----|------|------|------|-----|
| 1  | 83.8 | 11.7 | 4.1  | 0.3 |
| 2  | 23.3 | 70.3 | 3.5  | 2.8 |
| 3  | 20.8 | 13.1 | 66.2 | 0.0 |
|    | 28.6 | 42.9 | 28.6 | 0.0 |

| I | 1     | 2    | 3    |     |
|---|-------|------|------|-----|
| 1 | 79.9  | 6.7  | 12.0 | 1.4 |
| 2 | 16.7  | 79.0 | 4.3  | 0.0 |
| 3 | 17.3  | 17.3 | 65.3 | 0.0 |
|   | 100.0 | 0.0  | 0.0  | 0.0 |

Ile

| NI | 1    | 2    | 3    |      |
|----|------|------|------|------|
| 1  | 88.9 | 6.7  | 3.4  | 1.0  |
| 2  | 31.5 | 57.0 | 8.7  | 2.7  |
| 3  | 44.6 | 8.9  | 42.6 | 4.0  |
|    | 42.9 | 19.0 | 19.0 | 19.0 |

| I | 1    | 2     | 3    |     |
|---|------|-------|------|-----|
| 1 | 90.5 | 4.2   | 5.3  | 0.0 |
| 2 | 46.7 | 41.5  | 11.9 | 0.0 |
| 3 | 23.1 | 23.1  | 53.8 | 0.0 |
|   | 0.0  | 100.0 | 0.0  | 0.0 |

Leu

| NI | 1    | 2    | 3    |       |
|----|------|------|------|-------|
| 1  | 89.9 | 8.2  | 1.8  | 0.1   |
| 2  | 27.5 | 71.5 | 0.7  | 0.3   |
| 3  | 37.5 | 16.7 | 45.8 | 0.0   |
|    | 0.0  | 0.0  | 0.0  | 100.0 |

| I | 1     | 2    | 3    |     |
|---|-------|------|------|-----|
| 1 | 86.9  | 11.2 | 1.3  | 0.6 |
| 2 | 38.4  | 60.1 | 1.4  | 0.0 |
| 3 | 56.7  | 13.3 | 30.0 | 0.0 |
|   | 100.0 | 0.0  | 0.0  | 0.0 |

Asn

| NI | 1    | 2    | 3    |      |
|----|------|------|------|------|
| 1  | 82.0 | 13.0 | 4.1  | 0.9  |
| 2  | 27.9 | 68.4 | 2.9  | 0.7  |
| 3  | 19.7 | 6.8  | 63.2 | 10.3 |
|    | 32.1 | 10.7 | 39.3 | 17.9 |

| I | 1    | 2    | 3    |      |
|---|------|------|------|------|
| 1 | 83.1 | 13.1 | 1.2  | 2.6  |
| 2 | 36.6 | 61.1 | 2.3  | 0.0  |
| 3 | 28.9 | 16.7 | 50.0 | 4.4  |
|   | 37.9 | 13.8 | 24.1 | 24.1 |

Tyr

| NI | 1    | 2    | 3    |      |
|----|------|------|------|------|
| 1  | 94.3 | 4.2  | 1.5  | 0.0  |
| 2  | 6.1  | 91.6 | 0.6  | 1.7  |
| 3  | 10.3 | 3.7  | 86.0 | 0.0  |
|    | 50.0 | 0.0  | 0.0  | 50.0 |

| I | 1    | 2    | 3    |     |
|---|------|------|------|-----|
| 1 | 90.0 | 6.0  | 2.0  | 2.0 |
| 2 | 16.7 | 77.2 | 6.1  | 0.0 |
| 3 | 12.0 | 5.4  | 82.6 | 0.0 |
|   | 0.0  | 0.0  | 0.0  | 0.0 |



Trp

| NI | 1    | 2    | 3    | 4    | 5    | 6    | 7    |
|----|------|------|------|------|------|------|------|
| 1  | 84.9 | 6.0  | 0.0  | 1.5  | 3.0  | 1.5  | 1.5  |
| 2  | 0.0  | 83.8 | 4.1  | 0.0  | 8.1  | 0.0  | 4.1  |
| 3  | 0.0  | 0.0  | 77.4 | 0.0  | 0.0  | 0.0  | 22.6 |
| 4  | 26.3 | 0.0  | 4.4  | 65.0 | 4.4  | 0.0  | 0.0  |
| 5  | 8.5  | 8.5  | 0.0  | 0.0  | 74.6 | 0.0  | 8.5  |
| 6  | 20.0 | 13.3 | 0.0  | 13.3 | 0.0  | 40.0 | 6.7  |
| 7  | 7.8  | 0.0  | 0.0  | 0.0  | 0.0  | 0.0  | 84.4 |
|    | 0.0  | 0.0  | 0.0  | 0.0  | 40.0 | 0.0  | 0.0  |

| l | 1    | 2    | 3    | 4    | 5    | 6     | 7     |
|---|------|------|------|------|------|-------|-------|
| 1 | 81.8 | 3.6  | 7.4  | 0.0  | 3.6  | 0.0   | 3.6   |
| 2 | 12.2 | 87.8 | 0.0  | 0.0  | 0.0  | 0.0   | 0.0   |
| 3 | 33.1 | 0.0  | 44.6 | 0.0  | 0.0  | 0.0   | 22.3  |
| 4 | 43.0 | 14.0 | 14.0 | 29.0 | 0.0  | 0.0   | 0.0   |
| 5 | 0.0  | 0.0  | 0.0  | 24.6 | 50.9 | 0.0   | 24.6  |
| 6 | 0.0  | 0.0  | 0.0  | 0.0  | 0.0  | 100.0 | 0.0   |
| 7 | 0.0  | 0.0  | 0.0  | 0.0  | 0.0  | 0.0   | 100.0 |
|   | 67.4 | 0.0  | 0.0  | 0.0  | 0.0  | 32.6  | 0.0   |

Met

| NI | 1    | 2    | 3    | 4    | 5    |
|----|------|------|------|------|------|
| 1  | 62.1 | 5.8  | 4.3  | 4.3  | 5.8  |
| 2  | 11.9 | 66.2 | 0.0  | 0.0  | 5.8  |
| 3  | 18.8 | 33.7 | 13.9 | 9.9  | 5.0  |
| 4  | 0.0  | 32.8 | 8.6  | 41.4 | 0.0  |
| 5  | 0.0  | 0.0  | 0.0  | 0.0  | 50.0 |
|    | 17.6 | 23.6 | 3.0  | 3.0  | 11.5 |

| l | 1    | 2    | 3    |
|---|------|------|------|
| 1 | 66.3 | 16.6 | 8.6  |
| 2 | 12.4 | 56.2 | 12.4 |
| 3 | 14.6 | 14.6 | 14.6 |
| 4 | 20.3 | 20.3 | 0.0  |
|   | 14.8 | 26.5 | 11.7 |

Glu

| NI | 1    | 2    | 3    | 4    | 5    | 6    | 7    |
|----|------|------|------|------|------|------|------|
| 1  | 64.3 | 11.8 | 9.7  | 4.7  | 3.2  | 3.5  | 0.6  |
| 2  | 17.2 | 57.0 | 5.9  | 9.0  | 3.2  | 3.2  | 0.5  |
| 3  | 20.8 | 7.1  | 49.4 | 12.3 | 3.9  | 3.2  | 0.6  |
| 4  | 11.6 | 7.2  | 14.5 | 53.6 | 5.8  | 2.9  | 1.4  |
| 5  | 17.7 | 11.3 | 9.7  | 6.5  | 37.1 | 8.1  | 4.8  |
| 6  | 14.3 | 18.6 | 8.6  | 2.9  | 5.7  | 40.0 | 4.3  |
| 7  | 12.1 | 9.1  | 6.1  | 6.1  | 15.2 | 6.1  | 33.3 |
| 8  | 20.0 | 20.0 | 6.7  | 33.3 | 6.7  | 0.0  | 0.0  |
|    | 24.4 | 22.0 | 19.5 | 12.2 | 4.9  | 4.9  | 4.9  |

| l | 1    | 2    | 3    | 4    | 5    | 6    | 7    |
|---|------|------|------|------|------|------|------|
| 1 | 51.8 | 17.8 | 11.4 | 1.5  | 2.9  | 2.0  | 0.6  |
| 2 | 18.1 | 51.6 | 7.5  | 2.8  | 4.7  | 4.7  | 3.9  |
| 3 | 21.2 | 10.6 | 49.6 | 0.0  | 6.2  | 4.4  | 1.8  |
| 4 | 17.5 | 38.6 | 8.8  | 17.5 | 8.8  | 0.0  | 0.0  |
| 5 | 43.3 | 10.4 | 3.0  | 3.0  | 22.4 | 10.4 | 0.0  |
| 6 | 21.7 | 4.3  | 0.0  | 10.9 | 4.3  | 32.6 | 4.3  |
| 7 | 0.0  | 0.0  | 0.0  | 0.0  | 0.0  | 0.0  | 50.0 |
|   | 26.6 | 13.8 | 13.8 | 11.0 | 4.6  | 6.4  | 1.8  |

Gln

| NI | 1    | 2    | 3    | 4    | 5    | 6    | 7    |
|----|------|------|------|------|------|------|------|
| 1  | 66.4 | 9.3  | 7.2  | 4.1  | 1.8  | 2.8  | 0.0  |
| 2  | 22.2 | 47.4 | 5.3  | 8.8  | 2.9  | 1.8  | 1.8  |
| 3  | 19.5 | 5.9  | 52.1 | 5.9  | 3.0  | 1.8  | 0.0  |
| 4  | 12.7 | 12.7 | 8.8  | 49.0 | 0.0  | 2.0  | 1.0  |
| 5  | 27.5 | 5.0  | 17.5 | 0.0  | 27.5 | 2.5  | 2.5  |
| 6  | 10.7 | 28.6 | 3.6  | 14.3 | 3.6  | 25.0 | 3.6  |
| 7  | 10.0 | 30.0 | 0.0  | 0.0  | 10.0 | 10.0 | 20.0 |
|    | 18.3 | 16.1 | 12.9 | 8.6  | 7.5  | 9.7  | 2.2  |

| l | 1    | 2    | 3    | 4    | 5    | 6    |
|---|------|------|------|------|------|------|
| 1 | 58.1 | 16.3 | 3.6  | 4.5  | 3.6  | 1.2  |
| 2 | 23.9 | 47.2 | 11.7 | 7.4  | 4.9  | 2.5  |
| 3 | 11.5 | 0.0  | 71.0 | 3.1  | 0.0  | 0.0  |
| 4 | 19.5 | 15.6 | 10.4 | 29.9 | 0.0  | 5.2  |
| 5 | 20.0 | 20.0 | 10.0 | 0.0  | 20.0 | 0.0  |
| 6 | 42.6 | 0.0  | 0.0  | 7.4  | 0.0  | 27.8 |
|   | 19.0 | 17.1 | 24.4 | 7.3  | 3.9  | 3.9  |

## Lys

| NI | 1    | 2    | 3    | 4    | 5    | 1    | 1 | 2    | 3    | 4    | 5    |     |      |
|----|------|------|------|------|------|------|---|------|------|------|------|-----|------|
| 1  | 66.1 | 6.9  | 5.8  | 3.7  | 1.3  | 16.1 | 1 | 58.4 | 8.0  | 7.4  | 2.9  | 2.9 | 20.4 |
| 2  | 13.7 | 54.9 | 2.2  | 3.1  | 2.2  | 23.9 | 2 | 27.8 | 38.2 | 8.5  | 2.7  | 1.9 | 20.8 |
| 3  | 29.0 | 4.3  | 34.4 | 6.5  | 1.1  | 24.7 | 3 | 33.7 | 5.3  | 33.7 | 12.6 | 2.1 | 12.6 |
| 4  | 18.0 | 14.0 | 2.0  | 2.0  | 28.0 | 36.0 | 4 | 21.7 | 15.2 | 4.3  | 37.0 | 0.0 | 21.7 |
| 5  | 17.9 | 17.9 | 5.1  | 30.8 | 0.0  | 28.2 | 5 | 25.0 | 45.8 | 4.2  | 0.0  | 4.2 | 20.8 |
|    | 29.7 | 18.9 | 9.4  | 5.7  | 3.8  | 32.5 |   | 30.0 | 20.3 | 10.6 | 3.4  | 3.4 | 32.4 |

## Arg

| NI | 1    | 2    | 3    | 4    | 5    | 6    | 7    | 8    | 9   | 10   | 11   | 12  | 13  |      |
|----|------|------|------|------|------|------|------|------|-----|------|------|-----|-----|------|
| 1  | 49.7 | 3.9  | 10.9 | 3.3  | 3.3  | 1.0  | 1.3  | 0.7  | 0.7 | 1.0  | 1.0  | 0.3 | 0.0 | 23.0 |
| 2  | 12.4 | 44.9 | 11.2 | 0.0  | 2.2  | 3.4  | 3.4  | 1.1  | 0.0 | 0.0  | 4.5  | 1.1 | 0.0 | 15.7 |
| 3  | 19.9 | 3.3  | 42.4 | 2.0  | 3.3  | 3.3  | 2.6  | 1.3  | 0.7 | 0.7  | 2.0  | 0.7 | 0.0 | 17.9 |
| 4  | 18.6 | 2.3  | 7.0  | 37.2 | 2.3  | 0.0  | 0.0  | 0.0  | 2.3 | 2.3  | 0.0  | 0.0 | 0.0 | 27.9 |
| 5  | 23.9 | 8.7  | 13.0 | 0.0  | 26.1 | 4.3  | 0.0  | 2.2  | 0.0 | 2.2  | 2.2  | 2.2 | 0.0 | 15.2 |
| 6  | 18.5 | 3.7  | 14.8 | 0.0  | 3.7  | 29.6 | 3.7  | 0.0  | 3.7 | 0.0  | 0.0  | 0.0 | 0.0 | 22.2 |
| 7  | 9.5  | 2.4  | 14.3 | 2.4  | 2.4  | 2.4  | 33.3 | 0.0  | 0.0 | 2.4  | 2.4  | 0.0 | 0.0 | 28.6 |
| 8  | 7.1  | 7.1  | 0.0  | 0.0  | 0.0  | 0.0  | 14.3 | 28.6 | 0.0 | 7.1  | 0.0  | 0.0 | 0.0 | 35.7 |
| 9  | 15.8 | 5.3  | 5.3  | 0.0  | 5.3  | 0.0  | 5.3  | 0.0  | 0.0 | 0.0  | 26.3 | 5.3 | 0.0 | 31.6 |
| 10 | 27.3 | 0.0  | 0.0  | 9.1  | 9.1  | 0.0  | 0.0  | 0.0  | 0.0 | 22.7 | 0.0  | 4.5 | 0.0 | 27.3 |
| 11 | 0.0  | 0.0  | 0.0  | 0.0  | 0.0  | 0.0  | 0.0  | 0.0  | 0.0 | 0.0  | 0.0  | 0.0 | 0.0 | 0.0  |
|    | 25.0 | 8.9  | 7.7  | 4.4  | 3.2  | 2.0  | 3.2  | 1.6  | 1.2 | 4.0  | 2.0  | 2.0 | 0.0 | 34.7 |

| l  | 1    | 2    | 3    | 4    | 5    | 6    | 7   | 8    | 9    | 10   |       |
|----|------|------|------|------|------|------|-----|------|------|------|-------|
| 1  | 26.2 | 5.4  | 6.3  | 11.8 | 11.8 | 4.1  | 5.4 | 1.4  | 1.4  | 0.0  | 26.2  |
| 2  | 24.1 | 15.5 | 5.2  | 15.5 | 5.2  | 0.0  | 0.0 | 5.2  | 0.0  | 5.2  | 24.1  |
| 3  | 6.4  | 4.3  | 25.0 | 12.1 | 8.6  | 4.3  | 0.0 | 0.0  | 2.1  | 0.0  | 37.1  |
| 4  | 16.2 | 4.2  | 9.9  | 32.4 | 2.1  | 4.2  | 0.0 | 4.2  | 2.1  | 4.2  | 20.4  |
| 5  | 35.0 | 0.0  | 0.0  | 22.5 | 7.5  | 0.0  | 0.0 | 0.0  | 0.0  | 0.0  | 35.0  |
| 6  | 9.4  | 4.7  | 4.7  | 9.4  | 9.4  | 26.6 | 0.0 | 0.0  | 0.0  | 0.0  | 35.9  |
| 7  | 0.0  | 0.0  | 41.4 | 10.3 | 0.0  | 0.0  | 0.0 | 0.0  | 0.0  | 0.0  | 48.3  |
| 8  | 14.3 | 0.0  | 14.3 | 14.3 | 0.0  | 0.0  | 0.0 | 0.0  | 0.0  | 0.0  | 57.1  |
| 9  | 0.0  | 0.0  | 20.0 | 0.0  | 0.0  | 0.0  | 0.0 | 20.0 | 20.0 | 0.0  | 40.0  |
| 10 | 25.0 | 0.0  | 0.0  | 0.0  | 0.0  | 0.0  | 0.0 | 25.0 | 0.0  | 50.0 | 0.0   |
| 11 | 50.0 | 0.0  | 0.0  | 0.0  | 0.0  | 0.0  | 0.0 | 0.0  | 0.0  | 0.0  | 50.0  |
| 12 | 0.0  | 0.0  | 0.0  | 0.0  | 0.0  | 0.0  | 0.0 | 0.0  | 0.0  | 0.0  | 100.0 |
|    | 15.7 | 2.4  | 10.2 | 10.2 | 3.5  | 9.0  | 3.5 | 4.7  | 1.2  | 1.2  | 38.4  |

**Table S7.** Comparison of “Penultimate rotamer library”<sup>47</sup> (PL) and the redundant full unbound rotamer library.

| Amino acid | Rotamer <sup>a</sup> |    |    |    |    |    |    |    |    |
|------------|----------------------|----|----|----|----|----|----|----|----|
|            | 1                    | 2  | 3  | 4  | 5  | 6  | 7  | 8  | 9  |
| SER        | -2 <sup>b</sup>      | 1  | 0  |    |    |    |    |    |    |
|            | 2 <sup>c</sup>       | 1  | -2 |    |    |    |    |    |    |
| VAL        | 3                    | 1  | -1 |    |    |    |    |    |    |
|            | -5                   | 2  | 5  |    |    |    |    |    |    |
| THR        | 2                    | 1  | -4 |    |    |    |    |    |    |
|            | 2                    | -2 | 1  |    |    |    |    |    |    |
| CYS        | -1                   | 2  | 10 |    |    |    |    |    |    |
|            | 8                    | -2 | -5 |    |    |    |    |    |    |
| PRO        | 0                    | 0  |    |    |    |    |    |    |    |
|            | 11                   | -4 |    |    |    |    |    |    |    |
| ILE        | 4                    | 4  | 6  | 8  | 26 | 35 | 5  |    |    |
|            | -11                  | 3  | 0  | -1 | 4  | 2  | 1  |    |    |
| LEU        | 1                    | 5  | 36 |    |    |    |    | 10 | 20 |
|            | -1                   | -7 | 5  |    |    |    |    | 1  | -1 |
| ASN        | 25                   | 28 | 35 | 21 | 29 |    |    |    |    |
|            | 0.4                  | 1  | 14 | 2  | 0  |    |    |    |    |
| ASP        | 1                    | 7  | 8  |    |    | 48 |    |    |    |
|            | -9                   | -3 | 4  |    |    | -3 |    |    |    |
| HIS        | 3                    | 6  | 5  | 2  | 22 | 8  | 19 | 15 |    |
|            | -3                   | 7  | -3 | 1  | 1  | 1  | 0  | -1 |    |
| PHE        | 3                    | 5  | 3  | 0  |    |    |    |    |    |
|            | 0                    | 4  | -3 | -1 |    |    |    |    |    |
| TYR        | 3                    | 3  | 5  | 41 |    |    |    |    |    |
|            | 6                    | -2 | -1 | -3 |    |    |    |    |    |
| TRP        | 10                   | 7  | 5  | 14 | 6  | 31 | 1  |    |    |
|            | 7                    | -5 | 2  | -8 | -3 | 4  | 0  |    |    |

<sup>a</sup> Rotamer number is as in the redundant full unbound library

<sup>b</sup> RMSD in the dihedral angles space ( $\Delta\chi = \sqrt{\sum_i \Delta\chi_i^2}$ ) between closest rotamers in the two libraries

<sup>c</sup> Difference between rotamer shares in the two libraries

| Amino acid | Rotamer |    |     |    |    |    |    |    |    |    |    |    |    |    |    |    |    |    |    |    |    |    |    |    |    |    |   |  |  |  |  |
|------------|---------|----|-----|----|----|----|----|----|----|----|----|----|----|----|----|----|----|----|----|----|----|----|----|----|----|----|---|--|--|--|--|
|            | 1       | 2  | 3   | 4  | 5  | 6  | 7  | 8  | 9  | 10 | 11 | 12 | 13 | 14 | 15 | 16 | 17 | 18 | 19 | 20 | 21 | 22 | 23 | 24 | 25 | 26 |   |  |  |  |  |
| GLN        | 29      |    | 19  | 67 |    | 13 |    | 22 |    |    |    | 11 | 25 | 54 | 40 |    |    |    |    |    |    |    |    |    |    |    |   |  |  |  |  |
|            | -19     |    | -3  | -9 |    | -3 |    | 2  |    |    |    | -1 | 0  | -3 | -1 |    |    |    |    |    |    |    |    |    |    |    |   |  |  |  |  |
| GLU        | 1       |    | 9   | 19 |    | 12 |    | 14 | 34 |    | 33 |    |    | 9  |    |    |    |    |    |    |    |    |    |    |    |    |   |  |  |  |  |
|            | -12     |    | -11 | -2 |    | 1  |    | -2 | -2 |    | 0  |    |    | 1  |    |    |    |    |    |    |    |    |    |    |    |    |   |  |  |  |  |
| MET        | 6       | 22 | 7   | 19 | 7  | 12 | 7  | 11 |    | 15 |    |    |    |    |    |    |    |    |    |    |    |    |    |    |    |    |   |  |  |  |  |
|            | -1      | 2  | -6  | 2  | 4  | -2 | -3 | -1 |    | -1 |    |    |    |    |    |    |    |    |    |    |    |    |    |    |    |    |   |  |  |  |  |
| LYS        | 7       | 5  | 8   | 17 | 8  | 5  | 9  | 4  | 19 | 12 | 13 | 9  | 13 | 9  | 10 | 20 | 16 |    | 9  | 5  | 6  |    |    |    |    |    |   |  |  |  |  |
|            | 1       | -2 | 0   | 2  | -1 | 0  | 0  | 1  | 0  | -1 | 1  | 0  | 1  | 0  | 1  | 0  | 0  |    | 0  | 0  | 0  |    |    |    |    |    |   |  |  |  |  |
| ARG        | 11      | 17 | 12  | 40 | 23 | 27 | 5  | 2  | 9  |    | 10 | 15 | 12 | 14 | 18 | 16 | 14 | 30 | 10 | 13 | 37 | 23 | 9  | 18 | 7  | 25 |   |  |  |  |  |
|            | 1       | -1 | 1   | 4  | 1  | 0  | -2 | 4  | 2  |    | 0  | -2 | 0  | -1 | 0  | 0  | -1 | 1  | -1 | 0  | 0  | -1 | -1 | -1 | -1 | -1 | 0 |  |  |  |  |
